# Supplementary material for: Atmospheric CO 2 and CH 4 abundances on regional scales in borealareas using CAMS reanalysis, COCCON spectrometers and Sentinel-5 Precursor satellite observations
Source: Copernicus journal article supplement (doi:10.5194/amt-2020-19), 2020-02-12
Supplement: Supplementary file [file amt-2020-19-AC3-supplement.pdf]

## Response to Referee #2

We thank referee #2 for taking the time to review this manuscript and provide valuable and constructive feedback. We have addressed all the points one-by-one raised by the reviewer (copied here and shown in black text) along with the corresponding reply from the authors (in blue text, page and line number in revised version).

1) Line 45: 'satellite observations at high latitudes have lower confidence due to the high airmass present in the path of the incoming signal' – is there a reference that can support this statement?

We rephrase this sentence according to the referee's comment.

P2-line 49: "The satellite validation at high latitudes is limited by the relatively small number of ground-based stations (Wunch et al., 2017) and the high airmass may introduce a higher level of spectroscopic uncertainties (Jacobs et al., 2020)."

Jacobs, N., Simpson, W. R., Wunch, D., O'Dell, C. W., Osterman, G. B., Hase, F., Blumenstock, T., Tu, Q., Frey, M., Dubey, M. K., Parker, H. A., Kivi, R., and Heikkinen, P.: Quality controls, bias, and seasonality of CO<sub>2</sub> columns in the Boreal Forest with OCO-2, TCCON, and EM27/SUN measurements, *Atmos. Meas. Tech. Discuss.*, <https://doi.org/10.5194/amt-2019-505>, in review, 2020.

2) Line 100: typo, should read 'CH<sub>4</sub>', not 'CO<sub>4</sub>'.

We modified the text according to the referee's comment (P4-line 106).

3) Line 100: 'compared with the TCCON official MAP a-priori profiles' – please explain briefly what these are (this is addressed at Line 165, but it would be better to do this here since this is the first place in the manuscript that the MAP profiles are mentioned).

The descriptive sentences about MAP a-priori profiles were moved to the section of Introduction. We also modified the text according to the referee's comment.

P4-line 108: "We refer to the TCCON a-priori profiles as "MAP" files, following the naming convention used for the TCCON processing. The profiles are derived from a stand-alone program to generate profiles as described in Toon et al., 2017. These profiles are based on temperature, pressure and humidity generated by National Centers for Environmental Prediction/National Center for Atmospheric Research (NCEP/NCAR), empirically derived from MkIV FTIR balloon flights (Toon, 1991) and in-situ GLOBALVIEW data (GLOBALVIEW-CO<sub>2</sub>, 2006). The MAP profiles are up to 70 km and are sampled on an equidistant 1 km grid."

4) Line 118: 'The public S5P CH4 data. . .' – please provide a reference for the dataset used (e.g. can be webpage and date of access if acquired from a web portal) including the version number.

We add the reference to the dataset in text and in the “Data availability” according to the referee’s comment.

P5-line 130: “The public S5P CH4 data are only available since May 2018 (<https://s5phub.copernicus.eu/dhus/#/home>).”

5) Line 140: possible typo, should this read ‘6-hourly’ instead of ‘hourly’?

We modified the text according to the referee’s comment (P5-line 152).

6) Line 147: Please include in this paragraph how frequently the AirCore was flown during the campaign (or a cross reference to Section 3.1.2, though I think this information would be better placed in the ‘Sites and Data’ Section). Were the AirCore launches always at the same time of day, and were they timed to coincide with S5P overpasses?

We modified the text according to the referee’s comment.

P5-line 159: “The AirCore instrument launches were performed on sunny days when the TCCON and COCCON instruments were taking measurements. There were 10 launches in 2017 and 9 launches in 2018, covering the spring to autumn period. We add a table providing the launch dates and times in the Appendix (Table A.2).”

The AirCore launches generally started between 8 UTC and 12 UTC, during which the S5P satellite overpasses Kiruna and Sodankylä. However, there are only 9 AirCore launches available in 2018 (S5P data are available from 2018), which in general are not coincident with S5P overpasses. Therefore, in this study we follow the approach of exploiting the in-situ measured profiles by AirCore for achieving an assessment of the quality of the a-priori profiles (MAP versus CAMS) used for the analysis of the remote sensing observations, rather than attempting direct validation of S5P observations based on AirCore data.

7) Line 161: Is there a reference for the PROFFAST algorithm that you can include here?

We modified the text according to the referee’s comment.

P6-line 175: “A preprocessing tool developed by KIT in the framework of the COCCON-PROCEEDS project founded by ESA generates spectra from raw interferograms and performs quality checks (Frey et al., 2019; Sha et al., 2019). The column abundances of trace gases are subsequently retrieved from the spectra using the PROFFAST retrieval code. PROFFAST is a nonlinear least squares spectral fitting algorithm, scaling the a-priori dry-air mole fraction gas profiles to generate the best spectral fit to the measured spectrum.”

8) Line 170: Clarification: are the daily 1200 UTC CAMS profiles used as a priori information the same as those in the model dataset described in Section 2?

The CAMS 6-hourly analysis data of XCO<sub>2</sub> and XCH<sub>4</sub> is the integral of the CAMS profiles that are used as a priori information for the retrieval.

Additional description is added to the Introduction where the CAMS data is first mentioned.

P4-line106: "This work uses CAMS 6-hourly analysis data of XCO<sub>2</sub> and XCH<sub>4</sub>, integrated from CAMS volume mixing ratio (VMR) profiles of CO<sub>2</sub> and CH<sub>4</sub>, respectively."

9) Line 184: I would be wary of using the term 'underestimated' here, since both the MAP and the CAMS profiles are model-based estimates whereas this implies that the CAMS profile is the 'truth' that you're comparing MAPS against. Explicitly say that the MAP profiles are underestimated relative to CAMS, or that the MAP profile estimates are lower than the CAMS estimates. The same point applies to Line 190.

We modified the text according to the referee's comment (P7-line 193).

10) Line 209: 'likely due to the seasonal bias in CAMS' – please include a reference to back up this statement.

The sentence was not properly stated and we rephrased it.

P7-line 217: "The CAMS profiles show a slightly higher bias of CO<sub>2</sub> in the troposphere during summer 2018 when a drought anomaly occurred. During drought weather, the air is moving upwards resulting in an increasing CO<sub>2</sub> concentration in the mid-troposphere (Jiang et al., 2017) and this impact is overestimated in CAMS data (Christophe et al., 2019)."

Christophe, Y., M. Ramonet, A. Wagner, M. Schulz, H. J. Eskes, S. Basart, A. Benedictow, Y. Bennouna, A.-M. Blechschmidt, S. Chabrillat, E. Cuevas, A. El-Yazidi, H. Flentje, K.M. Hansen, U. Im, J. Kapsomenakis, B. Langerock, A. Richter, N. Sudarchikova, V. Thouret, T. Warneke, C. Zerefos, Validation report of the CAMS near-real-time global atmospheric composition service: Period March - May 2019, Copernicus Atmosphere Monitoring Service (CAMS) report, CAMS84\_2018SC1\_D1.1.1\_MAM2019\_v1.pdf, September 2019, doi:10.24380/1t4q-1h53, 2019.

Jiang, X., Kao, A., Corbett, A., Olsen, E., Pagano, T., Zhai, A., Newman, S., Li, L. and Yung, Y.: Influence of Droughts on Mid-Tropospheric CO<sub>2</sub>. Remote Sensing. 9. 852. 10.3390/rs9080852, 2017.

11) Line 237: It would be useful to include example averaging kernel plots from the Sodankyla observations, if possible.

Averaging kernel plots are added according to the referee's comments (P19-Figure 6).

P8-line 248: "The partial column sensitivities of TCCON and COCCON both are imperfect and differ from each other. Exemplary averaging kernels are presented in Figure 6."

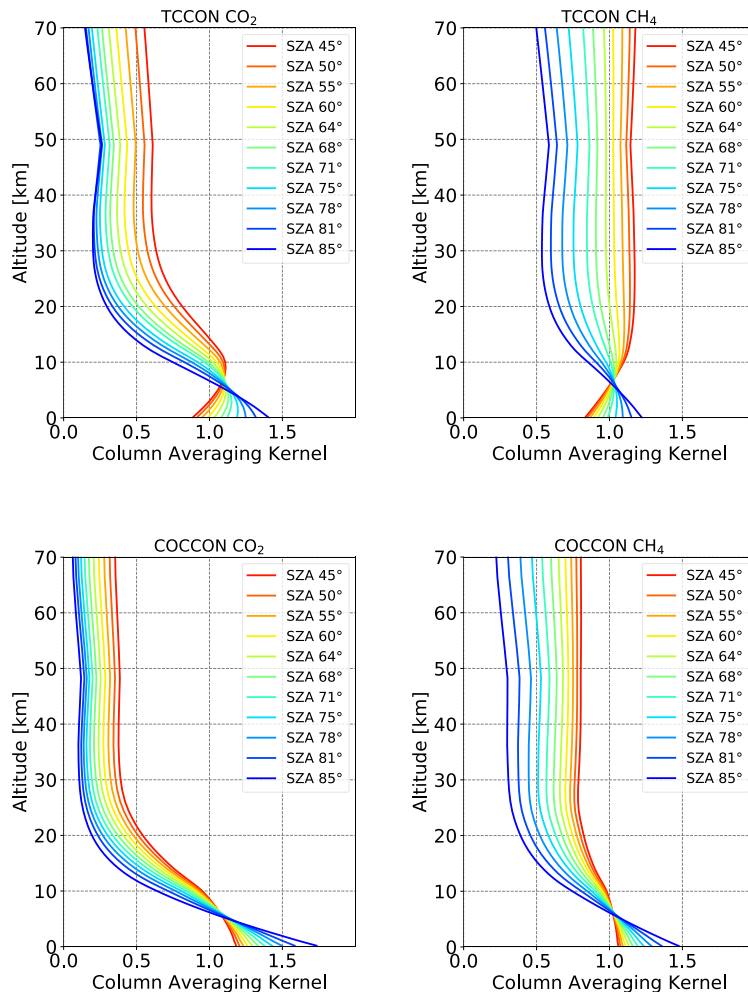

Figure 6. An example of the averaging kernels comparison at different SZA for the TCCON and COCCON instrument performed at June 8, 2017. The COCCON instrument are generally less sensitive to changes of SZA.

12) Line 238: 'we expect that a more realistic a-priori profile will bring the results in better agreement' – can you briefly explain why the MAPS profiles are used in TCCON, when more realistic representations of the atmosphere are available? I think TCCON uses the MAPS profiles for operational reasons, i.e. interpolating NCEP is much simpler than generating high resolution model output for every TCCON location, plus even a high resolution atmospheric model can be

more realistic in some regions compared with others – possibility of site vs. site biases being introduced.

We modified the text according to the referee's comment.

P8-line 249: "Therefore, we expect that a more realistic a-priori profile will bring the results in better agreement. But it should be noted that the MAP profiles used in TCCON have their own advantages. It is much simpler to interpolate NCEP data than generating high-resolution model output from every TCCON locations. Meanwhile, a high-resolution atmosphere model provides near-realistic profiles, reducing biases due to the smoothing error."

13) Line 242: Comparison of TCCON vs COCCON XCO<sub>2</sub> – according to Wunch et al (2011), an airmass bias correction is applied to the standard TCCON XCO<sub>2</sub> data. Has this airmass bias correction been removed from the TCCON data for this comparison, or has an airmass bias correction been applied to your COCCON data to ensure that the two datasets are being treated in the same way?

The airmass dependent correction is mainly resulting from existing imperfections of the spectroscopic line lists. For removing the resulting artefacts on XGas, both TCCON and COCCON apply a-posteriori airmass-dependent corrections as part of their processing chain. In this study we use the official TCCON and COCCON results which therefore include the airmass bias correction.

14) Line 257: 'The COCCON data discussed below are using the CAMS profiles as a-priori profiles' – I'm happy with the justification for using CAMS instead of MAPS, based on the impact that the polar vortex has on the profile shape, and the errors that an incorrect profile shape introduces in a profile-scaling retrieval. However, can the columns retrieved using the CAMS profiles still be referred to as 'COCCON data' if a different a priori profile is used from the one used in the standard COCCON retrieval procedure?

If as a result the data quality is no longer directly comparable with that obtained by other instruments operating in the COCCON framework (which may refer to this paper when publishing their own work), then it may be necessary to clarify this distinction by referring to this data as 'COCCON-CAMS', for example, when the CAMS (i.e. non COCCON) profile is used in the retrieval.

We use "COCCON-CAMS" instead of "COCCON" when the COCCON data are processed with the CAMS profiles according to the referee's comment. The same change is applied for TCCON data processed with the CAMS profiles. Relevant figures are renewed.

15) Line 258: in Section 3.2, can you clarify whether the CAMS reanalysis data you compare against is the same as that used for the a priori profiles in the retrieval?

The CAMS analysis data (XCO<sub>2</sub>, XCH<sub>4</sub>) is column-averaged mole fraction integrated from the profiles. We have added this explanation to P4-line 106.

16) Line 315: typo, missing ‘)’

We modified the text according to the referee’s comment.

17) Line 316: typo, missing ‘)’

We modified the text according to the referee’s comment.

18) Line 334: ‘MAP is more constant and overestimated over the whole year’ – same point as for Lines 184 and 190, clarify that this is an overestimate compared with the CAMS estimate (e.g. ‘the MAP estimated CH<sub>4</sub> is more constant, and greater than that estimated by CAMS over the whole year’)

We modified the text according to the referee’s comment (P7-line193, P7-line199 and P12-line 355).

19) Line 352: ‘In contrast, the S5P satellite generally measures lower atmospheric XCH<sub>4</sub> than COCCON’ – is this also seen in other studies comparing S5P with TCCON and/or EM27/SUN data? Is this finding specific to boreal regions? Also, if this is the first comparison to be published between EM27/SUN and S5P then I think this is worth mentioning both here and in the abstract.

1. The S5P XCH<sub>4</sub> observations have been validated with the measurements from the TCCON network by the S5P operational validation team and S5P XCH<sub>4</sub> exhibits a relative bias of -0.68% with respect to the TCCON XCH<sub>4</sub> values (Lambert et al., 2020). The relative biases of the S5P XCH<sub>4</sub> against COCCON are -0.51% in Kiruna and -0.47% in Sodankylä, respectively.

We modified the text according to the referee’s comment (P10-line303).

2. To our knowledge, this is the first published study using COCCON spectrometers for the validation of XCH<sub>4</sub> measurements collected by S5P. We add this point to the abstract and conclusion.

Lambert, J.-C., Compernelle, S., Eichmann, K.-U., de Graaf, M., Hubert, D., Keppens, A., Kleipool, Q., Langerock, B., Sha, M.K., Verhoelst, T., Wagner, T., Ahn, C., Argyrouli, A., Balis, D., Chan, K.L., De Smedt, I., Eskes, H., Fjæraa, A.M., Garane, K., Gleason, J.F., Goutail, F., Granville, J., Hedelt, P., Heue, K.-P., Jaross, G., Koukouli, M.L., Landgraf, J., Lutz, R., Nanda, S., Niemejer, S., Pazmiño, A., Pinardi, G., Pommereau, J.-P., Richter, A., Rozemeijer, N., Sneep, M., Stein Zweers, D., Theys, N., Tilstra, G., Torres, O., Valks, P., Vigouroux, C., Wang, P., and Weber, M.: Quarterly Validation Report of the Copernicus Sentinel-5 Precursor Operational Data Products #06: April 2018 – February 2020., S5P MPC Routine Operations Consolidated Validation Report series, Issue #06, Version 06.0.1, 154 pp., available at:

[http://www.tropomi.eu/sites/default/files/files/publicS5P-MPC-IASB-ROCVR-06.0.1-20200330\\_FINAL.pdf](http://www.tropomi.eu/sites/default/files/files/publicS5P-MPC-IASB-ROCVR-06.0.1-20200330_FINAL.pdf) (last access: 29 June 2020), March 2020.

20) Line 385: Please mention which satellite instrument the N<sub>2</sub>O data comes from in the caption for Figure 3.

The N<sub>2</sub>O data is retrieved from Aura/MLS satellite.

We modified the text according to the referee's comment (P17-Figure 4).

# Intercomparison of atmospheric CO<sub>2</sub> and CH<sub>4</sub> abundances on regional scales in boreal areas using CAMS analysis, COCCON spectrometers and Sentinel-5 Precursor satellite observations

Qiansi Tu<sup>1</sup>, Frank Hase<sup>1</sup>, Thomas Blumenstock<sup>1</sup>, Rigel Kivi<sup>2</sup>, Pauli Heikkinen<sup>2</sup>, Mahesh Kumar Sha<sup>3</sup>,  
5 Uwe Raffalski<sup>4</sup>, Jochen Landgraf<sup>5</sup>, Alba Lorente<sup>5</sup>, Tobias Borsdorff<sup>5</sup>, Huilin Chen<sup>6</sup>, Florian Dietrich<sup>7</sup>, Jia  
Chen<sup>7</sup>

<sup>1</sup>Karlsruhe Institute of Technology, Institute of Meteorology and Climate Research (IMK-ASF), Karlsruhe, Germany

<sup>2</sup>Finnish Meteorological Institute, Sodankylä, Finland

<sup>3</sup>Royal Belgian Institute for Space Aeronomy (BIRA-IASB), Brussels, Belgium

10 <sup>4</sup>Swedish Institute of Space Physics, Kiruna, Sweden

<sup>5</sup>SRON Netherlands Institute for Space Research, Utrecht, the Netherlands

<sup>6</sup>Centre for Isotope Research, University of Groningen, Groningen, the Netherlands

<sup>7</sup>Environmental Sensing and Modeling, Technical University of Munich, Munich, Germany

15 *Correspondence to:* Qiansi Tu (qiansi.tu@kit.edu)

## Abstract.

We compare the atmospheric column-averaged dry-air mole fractions of carbon dioxide (XCO<sub>2</sub>) and methane (XCH<sub>4</sub>) measured with a pair of Collaborative Carbon Column Observing Network (COCCON) spectrometers at Kiruna and Sodankylä sites in boreal areas with model data provided by the Copernicus Atmosphere Monitoring Service (CAMS) between 2017 and  
20 2019 and with XCH<sub>4</sub> from the recently launched Sentinel-5 Precursor (S5P) satellite between 2018 and 2019. In addition, measured and modeled gradients of XCO<sub>2</sub> and XCH<sub>4</sub> ( $\Delta$ XCO<sub>2</sub> and  $\Delta$ XCH<sub>4</sub>) on regional scales are investigated. Both sites show a similar and very good correlation between COCCON retrievals and the modeled CAMS XCO<sub>2</sub> data, while CAMS data are biased high with respect to COCCON by 3.72 ppm ( $\pm$ 1.80 ppm) in Kiruna and 3.46 ppm ( $\pm$ 1.73 ppm) in Sodankylä on average. For XCH<sub>4</sub> CAMS values are higher than the COCCON observations by 0.33 ppb ( $\pm$ 11.93 ppb) in Kiruna, and 7.39  
25 ppb ( $\pm$ 10.92 ppb) in Sodankylä. In contrast, the S5P satellite generally measures lower atmospheric XCH<sub>4</sub> than the COCCON spectrometers, with a mean difference of 9.69 ppb ( $\pm$ 20.51 ppb) in Kiruna and 3.36 ppb ( $\pm$ 17.05 ppb) in Sodankylä. We compare the gradients of XCO<sub>2</sub> and XCH<sub>4</sub> ( $\Delta$ XCO<sub>2</sub> and  $\Delta$ XCH<sub>4</sub>) between Kiruna and Sodankylä derived from CAMS analysis and COCCON and S5P measurements to study the capability of detecting sources and sinks on regional scales. The correlations in  $\Delta$ XCO<sub>2</sub> and  $\Delta$ XCH<sub>4</sub> between the different datasets are generally smaller than the correlations in XCO<sub>2</sub> and XCH<sub>4</sub> between  
30 the datasets at either site. The  $\Delta$ XCO<sub>2</sub> predicted by CAMS are generally higher than those observed with COCCON with a slope of 0.51. The  $\Delta$ XCH<sub>4</sub> predicted by CAMS is mostly higher than that observed with COCCON with a slope of 0.65, covering a larger dataset than the comparison between S5P and COCCON. When comparing CAMS  $\Delta$ XCH<sub>4</sub> with COCCON  $\Delta$ XCH<sub>4</sub> only in S5P overpass days (slope = 0.53), the correlation is close to that between S5P and COCCON (slope = 0.51).



CAMS, COCCON and S5P predict gradients in reasonable agreement. However, the small number of observations coinciding with S5P limits our ability to verify the performance of this **spaceborne** sensor. We detect no significant impact of ground albedo and viewing zenith angle on the S5P results. Both sites show similar situation with the average ratio of XCH<sub>4</sub> (S5P/COCCON) of  $0.9949 \pm 0.0118$  in Kiruna and  $0.9953 \pm 0.0089$  in Sodankylä. Overall, the results indicate that the COCCON instruments have the capability of measuring greenhouse gas (GHG) gradients on regional scales and observations performed with the portable spectrometers can contribute to inferring sources and sinks and to validating space borne greenhouse gas sensors. **To our knowledge, this is the first published study using COCCON spectrometers for the validation of XCH<sub>4</sub> measurements collected by S5P.**

## 1 Introduction

Carbon dioxide (CO<sub>2</sub>) concentrations in the atmosphere are steadily increasing since the industrialization. This rise is mainly attributed to manmade emissions as a consequence of the use of fossil fuels. **The global mean concentration of CO<sub>2</sub> in 2018 reached 147% of the abundance in 1750** (WMO Greenhouse Gases Bulletin, 2019). Methane (CH<sub>4</sub>), the second most important anthropogenic greenhouse gas (GHG) after CO<sub>2</sub>, has increased by about 259% since pre-industrial times (WMO Greenhouse Gases Bulletin, 2019). Since GHGs have a major impact on global climate, scientific research is aiming at accurate accounting of GHG exchanges for achieving a better understanding of the global carbon budget. Satellite measurements of column-averaged greenhouse gas abundances are an important source of information for this research. **The satellite validation at high latitudes is limited by the relatively small number of ground-based stations (Wunch et al., 2017) and the high airmass may introduce a higher level of spectroscopic uncertainties (Jacobs et al., 2020).** Because strong responses to climate change are expected at high latitudes, it is important to obtain accurate observations of GHGs also at high latitudes with high spatial and temporal coverage. Currently, both satellite and ground-based observations are used to monitor GHGs column-averaged abundances.

Sentinel-5 Precursor (S5P) is the first mission of the Copernicus Programme, aiming to monitor air quality, climate and ozone abundances with high spatio-temporal resolution and daily global coverage (Veefkind et al., 2012). The mission fills in the gap in the continuity between SCIAMACHY (**SCanning Imaging Absorption SpectroMeter for Atmospheric CHartography**) on board Envisat (Bovensmann et al., 1999) and Sentinel-5 (<https://earth.esa.int/web/guest/missions/esa-future-missions/sentinel-5>). The S5P satellite was launched on October 13, 2017 and operates in a low Earth polar orbit, with an operational lifespan of 7 years. Its single payload, the TROPospheric Monitoring Instrument (TROPOMI) is a nadir-viewing grating spectrometer that covers wavelength bands from ultraviolet to shortwave infrared (SWIR). TROPOMI measures back-scattered solar radiation spectra using a push-broom configuration combining a swath width of 2600 km. The instrument features a very high spatial resolution of approximately  $7 \times 7 \text{ km}^2$  ( $5.5 \times 7 \text{ km}^2$  since August 2019) in the SWIR spectral band at nadir providing global daily coverage. The SWIR module on TROPOMI covers the spectral range of 4190 to

65 4340  $\text{cm}^{-1}$  (spectral resolution: 0.45  $\text{cm}^{-1}$ ) and is used to measure the concentration of methane and carbon monoxide in the Earth's atmosphere (Butz et al., 2012; Hu et al., 2018).

To validate the S5P column-averaged  $\text{CH}_4$  observations, the ground-based column-averaged  $\text{CH}_4$  measurements from solar-viewing near-infrared spectrometers are comprehensively used (Lambert et al., 2019). The Total Carbon Column Observing Network (TCCON) is a global network of ground-based Fourier transform infrared (FTIR) spectrometers, measuring solar  
70 absorption spectra in the near infrared region to retrieve column-averaged dry-air mole fractions of  $\text{CO}_2$  ( $\text{XCO}_2$ ) and  $\text{CH}_4$  ( $\text{XCH}_4$ ) amongst other gases (Wunch et al., 2011). The TCCON measurements have high precision because the effect of surface properties and aerosols on the measurements are minimal (Wunch et al., 2017). The measurements are scaled to the World Meteorological Organization (WMO) reference scale applying a post correction and thereby guaranteeing high accuracy (Wunch et al., 2015). The high-resolution TCCON sites are distributed globally, however, many of these are concentrated in  
75 Europe, Northern America and eastern Asia. The costs, logistic requirements and the need of qualified personnel on site have hindered the expansion of the network e.g. to the African continent, South America and central Asia (Wunch et al., 2011). Remote sites and regions with high or low surface albedo are generally poorly covered by the TCCON network. Ground-based measurement stations in the above mentioned regions are needed for satellite and model validation and carbon cycle science.

Recently, cheaper and portable spectrometers have been developed and are now available for GHG measurements, with the  
80 potential to complement the TCCON network (Frey et al., 2019; Sha et al., 2019). The EM27/SUN FTIR spectrometer was developed by Karlsruhe Institute of Technology (KIT) (Gisi et al., 2012), in cooperation with Bruker Optics GmbH, Ettlingen, Germany. It is available from Bruker as a commercial device since spring 2014. The EM27/SUN instrument is a portable ground-based FTIR spectrometer, consisting of a spectrometer body with dimensions of  $35 \times 40 \times 27$  cm and a solar tracker which is directly mounted on the spectrometer. The whole weight is approximately 25 kg and can be carried by one person.  
85 This solar-viewing FTIR instrument has a resolution of 0.5  $\text{cm}^{-1}$ , similar to that of TROPOMI. This compact and mobile EM27/SUN instrument is appropriate for field campaigns as well as for long-term deployment at a site with the potential to complement the TCCON network. In addition, its excellent robust and reliable characteristics have been demonstrated in several successful field campaigns (Frey et al., 2015; Klappenbach et al., 2015; Chen et al., 2016; Hedelius et al., 2016; Butz et al., 2017; Toja-Silva et al., 2017; Vogel et al., 2019; Kille et al., 2019; Sha et al., 2019b; Luther et al., 2019). KIT performs  
90 final optimizations, an expert review of instrument performance and a final calibration of each unit with respect to the reference EM27/SUN spectrometer operated at KIT and the TCCON site in Karlsruhe. In the framework of European Space Agency (ESA) recent projects, codes required for the data processing and analysis of EM27/SUN measurements spectra have been developed by KIT, which are open source and freely available (<https://www.imk-asf.kit.edu/english/3225.php>). If the operation of EM27/SUN spectrometers adheres to the described standards (use of calibrated units, processing using the provided codes),  
95 then this practice is compatible with the requirements of Collaborative Carbon Column Observing Network (COCCON, see Frey et al., 2019). The data presented in this paper have been generated using a pair of EM27/SUN spectrometers following these requirements. For this reason, we refer to these as COCCON spectrometers in the following.

This paper compares S5P observations to the ground-based observations performed with two COCCON spectrometers at the boreal sites in Sodankylä, Finland and Kiruna, Sweden. The measurements from these two sites are highly valuable for investigating the gradients of the greenhouse gas distribution on regional scales near the Arctic Circle. In addition to the COCCON and the S5P datasets, we investigate the CO<sub>2</sub> and CH<sub>4</sub> products from Copernicus Atmosphere Monitoring Service (CAMS). CAMS services are operated by the European Centre for Medium-Range Weather Forecasts (ECMWF), providing near-real-time analysis and forecast data with a spatial resolution of approximately 25 km (Agustí-Panareda et al., 2014; Massart et al., 2014, 2016). The CAMS analysis dataset is the latest global analysis dataset of atmospheric composition, though a reanalysis for the greenhouse gases (CO<sub>2</sub>, CH<sub>4</sub>) is being produced separately (Inness et al., 2019). This work uses CAMS 6-hourly analysis data of XCO<sub>2</sub> and XCH<sub>4</sub>, integrated from CAMS volume mixing ratio (VMR) profiles of CO<sub>2</sub> and CH<sub>4</sub>, respectively. CAMS profiles of CO<sub>2</sub> and CH<sub>4</sub> are also used to study the quality of a-priori profiles used for the trace gas retrievals, and compared with the TCCON official a-priori profiles. We refer to the TCCON a-priori profiles as “MAP” files, following the naming convention used for the TCCON processing. The profiles are derived from a stand-alone program to generate profiles as described in Toon et al., 2017. These profiles are based on temperature, pressure and humidity generated by National Centers for Environmental Prediction/National Center for Atmospheric Research (NCEP/NCAR), empirically derived from MkIV FTIR balloon flights (Toon, 1991) and in-situ GLOBALVIEW data (GLOBALVIEW-CO<sub>2</sub>, 2006). The MAP profiles are up to 70 km and are sampled on an equidistant 1 km grid.

The following section gives a description of the sites and data sources. The results and discussions are given in section 3 and the final conclusions are discussed in section 4.

## 2 Sites and data sources

Multi-year measurements using two COCCON spectrometers were performed from March 2017 until end of 2019 at the Finnish Meteorological Institute (FMI), Sodankylä, Finland (67.37°N, 26.63°E, 181 m a.s.l.) and at the Swedish Institute of Space Physics (IRF), Kiruna, Sweden (67.84°N, 20.41°E, 419 m a.s.l.) (Figure 1). The area around these two sites represents a typical northern boreal forest/taiga environment, surrounded predominantly by coniferous forest with some mixed/deciduous forest. Regular TCCON measurements are performed at the Sodankylä site since 2009 providing XCO<sub>2</sub> and XCH<sub>4</sub> measurements (Kivi et al., 2016). The COCCON operation at the FMI observational station is performed in the framework of the Fiducial Reference Measurements for Ground-Based Infrared Greenhouse Gas Observations campaign (FRM4GHG, <http://frm4ghg.aeronomie.be/>) funded by ESA. The COCCON instrument in Sodankylä was at the beginning operated next to the campaign container by personnel on site, then moved to the roof of the campaign container (184 m a.s.l.) on September 25, 2018. Since then the measurements were performed remotely using an automated enclosure system, which was developed for the automatic remote control and protection of the COCCON instrument (Heinle and Chen, 2018; Dietrich et al., 2018). The cover of the enclosure rotates during the course of the day following the trajectory of the sun. In case of bad weather, the cover closes automatically to protect the instrument inside.

130 The public S5P CH<sub>4</sub> data are only available since May 2018 (<https://s5phub.copernicus.eu/dhus/#/home>). The comparison between the S5P and the COCCON measurements starts since the beginning of the public data. Currently, the Level-2 (L2) products of S5P are released, including the column-average dry-air mole fraction of methane, XCH<sub>4</sub>. This value presents the total column of methane in the atmosphere from the surface up to the top of the atmosphere divided by the corresponding dry-air column (Apituley et al., 2017). S5P L2 products provide bias corrected XCH<sub>4</sub> retrievals, which are used in this work. The quality control value (qa\_value) is given as part of the CH<sub>4</sub> data product and it is recommended to use only data with qa value above 0.5 to exclude data of questionable quality. To compare with the COCCON data, S5P data are collected from the average value within a radius of 100 km around each station. The radius criterion of 100 km was the best tested case as discussed in Sha et al., 2019a. When comparing the bias corrected S5P XCH<sub>4</sub> product with the NDACC (**Network for the Detection of Atmospheric Composition Change**) and TCCON FTIR products, it shows slightly higher correlation in using the radius criterion of 100 km than those of using 50 km. A 10-minute average value of COCCON data (retrieved from approximate 10 spectra) is obtained at the coincident S5P overpass time. The overpass time over Kiruna and Sodankylä stations is between 9 UTC to 12 UTC. The standard error of mean is used as error bar, as it presents the estimation of the standard deviation of its sampling distribution and is calculated by using:

$$\varepsilon = \frac{\sqrt{\frac{1}{n} \sum_i (x_i - \bar{x})^2}}{\sqrt{n}}, \quad (1)$$

145 here the  $x_i$  is single measurement in the defined area or time range,  $\bar{x}$  is mean value of data sample, n is the number of data points. This method is useful to distinguish highly scattered dataset, especially in S5P and CAMS data, which come from large areas.

The comparison between the CAMS analysis and the COCCON observations starts from the beginning of the field campaign (March 2017). **The CAMS 6-hourly analysis data of XCO<sub>2</sub> and XCH<sub>4</sub> are derived from CAMS VMR profiles in defined areas around Kiruna and Sodankylä.** These defined areas resemble rectangles of 100 km × 100 km, covering 67°N – 69°N and 18°E – 23°E around Kiruna; 66.5°N – 68.3°N and 24°E – 29°E around Sodankylä. In these defined areas there are 476 data points in total in the area of Kiruna and 442 data points in the area of Sodankylä within their respective measuring periods. We use the average value from these points as **6-hourly** CAMS analysis data. The coincident COCCON data are collected from one-hour average at 6 UTC or 12 UTC, because the spectrometer measures only at daytime. Additionally, selection criteria are applied to the COCCON data as described in the work of Frey et al. (2015). Measurements at solar zenith angle (SZA) > 80° are filtered out to reduce uncertainties connected to spectra recorded at very high airmasses. The data are also filtered based on Xair (column-averaged amount of dry air) and Xair range between 0.995 and 1.005 is required.

155 The chosen a-priori VMR profiles is mainly based on model data. To assess the quality of the model data, knowledge of the actual profiles is required and might be obtainable from in-situ instruments onboard aircrafts performing profile measurements or from in-situ AirCore balloon launches. **The AirCore instrument launches were performed on sunny days when the TCCON and COCCON instruments were taking measurements. There were 10 launches in 2017 and 9 launches in 2018, covering the**

spring to autumn period. We add a table providing the launch dates and times in the Appendix (Table A.2). The AirCore, which was an auxiliary activity in the FRM4GHG campaign, is a simple and viable atmospheric sampling system to measure vertical profiles of greenhouse gases (Karion et al., 2010). The AirCore system that was used in Sodankylä was built at the University of Groningen (UG) and at the FMI. It consists of a 100 m long coiled stainless steel tube, combining ~40 m of 0.25  
165 inch (6.35 mm) tube and ~60 m of 0.125 inch (3.175 mm) tube, along with an automatic shut-off valve and home-made data logger to record temperature and pressure during the flight. A 3 kg meteorological balloon was used to launch the AirCore along with a radiosonde and the payload positioning system. The air is evacuated from the tube during ascent to an altitude of ~30 km due to the pressure difference, while ambient air flushes into the tube as it descends. Upon landing the automatic valve shuts off to prevent any further exchange of the sampled air inside the tube with ambient air. A cavity ring-down spectrometer  
170 (CRDS) manufactured by Picarro Inc. is used afterwards to quantify the mole fractions of the target gases (e.g. CO<sub>2</sub> and CH<sub>4</sub>) in the AirCore sample.

### 3 Results and discussions

#### 3.1 Quality of a-priori profiles and their influence on the retrieval results

The choice of a-priori VMR vertical profiles for the target gases is important for retrieving correct column abundances from  
175 ground-based FTIR spectra. A preprocessing tool developed by KIT in the framework of the COCCON-PROCEEDS project founded by ESA generates spectra from raw interferograms and performs quality checks (Frey et al., 2019; Sha et al., 2019). The column abundances of trace gases are subsequently retrieved from the spectra using the PROFFAST retrieval code. PROFFAST is a nonlinear least squares spectral fitting algorithm, scaling the a-priori dry-air mole fraction gas profiles to generate the best spectral fit to the measured spectrum. In the following section two different sets of a-priori profiles are used  
180 for investigating the sensitivity of the retrievals with respect to the choice of the profiles. One set of VMR profiles is the one used by TCCON (MAP). Another set of daily profiles (at 12:00 UTC) is provided by CAMS. These daily CAMS profiles refer to 137 model levels from 0.1 km up to 80 km. The choice of altitude levels is based on the 1976 version of the International Civil Aviation Organization (ICAO) Standard Atmosphere.

##### 3.1.1 Comparison of the MAP and the CAMS profiles for the Sodankylä campaign site

185 The CO<sub>2</sub> and CH<sub>4</sub> profiles of MAP and CAMS in 2017 and 2018 for the Sodankylä campaign site are shown in Figure 2. The left columns show the MAP profiles, the middle columns show the CAMS profiles and the right columns show the difference of the MAP and the CAMS profiles as a function of the altitude. For CO<sub>2</sub> both profiles present similar seasonal changes and the highest near-ground concentration occur in winter and the lowest in summer. However, the CAMS profiles show higher vertical variability and more obvious seasonal changes over the whole year. Most of the time, the MAP profiles show lesser  
190 CO<sub>2</sub> concentrations than CAMS as seen in the difference plots for both 2017 and 2018 profiles (Figure 2 right columns). The main differences between MAP and CAMS CO<sub>2</sub> profiles occur in the troposphere and the difference at near ground ranges

from -15 ppm to 12 ppm for 2017 and -21 ppm to 12 ppm for 2018, showing a peak-to-peak variability of about 27 ppm in 2017 and 33 ppm in 2018. **The MAP profile estimates are lower than the CAMS estimates in early year and in autumn.** The largest difference at ground level is -14.9 ppm occurring on September 5, 2017 and is -21 ppm on August 9, 2018. In the  
195 stratosphere the CAMS CO<sub>2</sub> profiles show smaller vertical changes compared to the MAP profiles over the year, however they are generally higher in concentration than the MAP profiles over 40 km in 2017 and over 30 km in 2018. Altogether, the MAP a-priori profiles agree quite well with the CAMS profiles.

A much larger difference exists in CH<sub>4</sub> between the MAP and the CAMS profiles. CAMS shows a significant seasonal change, especially in the stratosphere, while MAP is more constant and **overestimated relative to CAMS** over the whole year.  
200 In contrast to CO<sub>2</sub>, the highest differences between MAP and CAMS appear in the lower stratosphere between 20 km and 40 km as seen for both 2017 and 2018 plots (Figure 2). In the beginning of the year, the difference between MAP and CAMS profiles is around 0.9 ppm at 28 km, and reaches to nearly 1 ppm at a lower level of 20 km in spring. The largest difference reaches up to 1.0 ppm at 22 km on April 12, 2017 and at 20 km on March 12 and 15, 2018. The MAP profiles are being close to CAMS and the highest difference is around 0.35 ppm at 33 km in summer 2017 and 2018. In winter, the differences are also  
205 obvious and near to 0.9 ppm at around 30 km. The steeper vertical gradients together with the dynamical processes occurring in the polar atmosphere make a climatological guess of a-profile shape much harder than for carbon dioxide and therefore the MAP a-priori profiles are less realistic for methane. We will investigate in the next section using AirCore soundings to which degree CAMS is capable of following the actual profile variability.

### **3.1.2 Comparison of in-situ AirCore profiles and CAMS profiles for the Sodankylä campaign site**

210 The in-situ profiles are derived from the AirCore balloon launches at the Sodankylä campaign site and up to an altitude of approximate 30 km. Figure 3 shows the differences of CO<sub>2</sub> and CH<sub>4</sub> between the AirCore and the CAMS profiles for 10 measurement days in 2017 and 9 measurement days in 2018. The AirCore launches cover the spring to autumn period.

The CAMS CO<sub>2</sub> profiles are generally overestimated compared to the AirCore profiles, with a mean difference on average of 1.35 ppm in 2017 and 3.33 ppm in 2018. In the 10 AirCore launched days in 2017, CAMS profiles are slightly overestimated  
215 in the stratosphere, while the tropospheric CAMS profiles are closer to the AirCore profiles in summer than those in autumn 2017. Two peak differences are found at altitude around 9 km with -5.98 ppm (AirCore - CAMS) on April 24 and -9.46 ppm on April 26 and another peak at around 1 km with -5.76 ppm on September 5, 2017. **The CAMS profiles show a slightly higher bias of CO<sub>2</sub> in the troposphere during summer 2018 when a drought anomaly occurred. During drought weather, the air is moving upwards resulting in an increasing CO<sub>2</sub> concentration in the mid-troposphere (Jiang et al., 2017) and this impact is**  
220 **overestimated in CAMS data (Christophe et al., 2019).** In general, CAMS profiles are overestimated over the whole vertical altitude range and differences in the stratospheric part are quite constant throughout the year. The averaged difference over 10 km is about -1.7 ppm in 2017 and -2.9 ppm in 2018.

The significant differences for CH<sub>4</sub> in the stratosphere can be seen in the early year when comparing CAMS with in-situ AirCore profiles. Two obvious differences occur on April 21 and 26, whose plots are highlighted with additional red and green

225 dots in Figure 3. CAMS underestimates 0.16 ppm atmospheric CH<sub>4</sub> abundances at around 19 km on April 21, 2017 and overestimates approximately 0.34 ppm CH<sub>4</sub> at around 22 km on April 26, 2017. The significant stratospheric subsidence in April 2017 is probably caused by the polar vortex. **Figure 4** (first two rows) shows N<sub>2</sub>O data from the Microwave Limb Sounder (MLS) on the Aura satellite for three days in April and one day in May 2017 when AirCore flights were performed. Because of its long life time, N<sub>2</sub>O is a good tracer for estimating the position of the polar vortex (Loewenstein et al., 1990; Sparling, 2000; Urban et al., 2004). Therefore, N<sub>2</sub>O concentrations at the 46 hPa level, approximately at the height of 20 km, are used here to study the XCH<sub>4</sub> abnormal observations. Obvious stratospheric subsidence is clearly seen over Finland in April and disappeared in May 2017. For the CH<sub>4</sub> profiles in the troposphere CAMS profiles are slightly underestimated in spring and overestimated in summer 2017 as compared to AirCore profiles, while the CAMS CH<sub>4</sub> profile is similar to that of AirCore from approximately 3 km up to 12 km, coupled with an underestimated profile in the stratosphere on October 9, 2017. The tropospheric CAMS profiles for 2018 are very similar to the AirCore profiles for all measurement days. However, the CAMS profile on April 17, 2018 have three obvious peaks with underestimations of 0.21 ppm at 20 km and of 0.32 ppm at 22 km and an overestimation of 0.23 ppm at 21 km. The CAMS overestimates the CH<sub>4</sub> concentration in the lower stratosphere on October 3, 2018. The difference between CAMS and AirCore profiles increases with height and reaches up to 0.13 ppm at 21 km, however, CAMS show an underestimation at higher levels, with a peak value of 0.15 ppm at 27 km.

240 Despite the remaining discrepancies, CAMS CH<sub>4</sub> profiles approximate the true state of the polar atmosphere considerably better than the MAP profiles used as a-priori for TCCON.

### 3.1.3 Comparison of COCCON and TCCON datasets with different a-priori profiles

When directly comparing the measurements of different remote sounders, it is necessary to account for differing observing systems characteristics, particularly the a-priori profiles used and the different sensitivity characteristic (Rodgers and Connor, 2003). In the following, we discuss the impact of the a-priori profile choice.

Figure 5 shows the comparison of XCO<sub>2</sub> and XCH<sub>4</sub> between COCCON and co-located TCCON as a reference in Sodankylä in 2017 and 2018. Since the same a-priori profiles are used, the differences between these two datasets are mainly from the different smoothing error characteristics. **The partial column sensitivities of TCCON and COCCON both are imperfect and differ from each other. Exemplary averaging kernels are presented in Figure 6.** Therefore, we expect that a more realistic a-priori profile will bring the results in better agreement. **But it should be noted that the MAP profiles used in TCCON have their own advantages. It is much simpler to interpolate NCEP data than generating high-resolution model output from every TCCON locations. Meanwhile, a high-resolution atmosphere model provides near-realistic profiles, reducing biases due to the smoothing error.** The left panel of Figure 5 shows results generated with the MAP a-priori profiles, while the right panel show the results achieved with the CAMS a-priori profiles. **To distinguish the COCCON and TCCON data processed with the MAP profiles, we use COCCON-CAMS and TCCON-CAMS to refer to the data processed with the a-priori profiles derived from CAMS.** The coincident data points are based on a 10-minute average and the error bars are presented with standard errors. Processed with the MAP profiles, COCCON and TCCON data show a generally good agreement in both XCO<sub>2</sub> and XCH<sub>4</sub>.

The COCCON instrument measures 0.74 ppm ( $\pm 0.49$  ppm) lower XCO<sub>2</sub> and 0.17 ppb ( $\pm 3.77$  ppb) lower XCH<sub>4</sub> on average than TCCON retrievals in 2017. The XCO<sub>2</sub> difference between COCCON and TCCON is slightly reduced in 2018, when COCCON retrievals are 0.57 ppm ( $\pm 0.49$  ppm) lower in XCO<sub>2</sub>. The difference of XCH<sub>4</sub> between COCCON and TCCON triples in 2018 compared to that of the previous year, when COCCON measures 0.57 ppb ( $\pm 3.47$  ppb) lower amount of XCH<sub>4</sub>. One reason for the change of XCH<sub>4</sub> is because the obvious biases in April 2017 which increases the yearly averaged value of the COCCON XCH<sub>4</sub>.

When using CAMS profiles as the a-priori information, COCCON-CAMS data show better correlations with TCCON-CAMS data than using MAP a-priori profiles, especially in XCH<sub>4</sub>. This is mainly because CAMS profiles have better seasonal variations, especially for CH<sub>4</sub>. A significant bias of XCH<sub>4</sub> in April 2017 and in March 2018 were found when using MAP a-priori profiles, which is mainly caused by the polar vortex (see Figure 4). The stratospheric subsidence was not included in the MAP profiles, resulting in high biases. However, these biases disappeared in the data comparison when using CAMS profiles and the correlation improved due to the better modeled profile information from CAMS. Ostler et al. (2014) investigated the stratospheric subsidence caused by the influence of the polar vortex and found different impacts on mid-infrared and near-infrared retrievals because of the differing sensitivity depending on the altitude, although the same a-priori VMR profiles were used. Here, a similar mechanism is at work, the different sensitivities between TCCON and COCCON generate different smoothing errors. The more realistic CAMS a-priori information reduces these discrepancies. The COCCON data discussed below are using the CAMS profiles as a-prior profiles (COCCON-CAMS).

## 3.2 Comparing COCCON observations with CAMS and S5P

### 3.2.1 XCO<sub>2</sub>

The XCO<sub>2</sub> intercomparison between CAMS and COCCON retrievals at Kiruna (left) and Sodankylä (right) sites from 2017 to 2019 are shown in Figure 7. COCCON retrievals (COCCON-CAMS) show a good and similar agreement with CAMS data at both sites with R<sup>2</sup> values of 0.9530 in Kiruna and 0.9756 in Sodankylä. The CAMS data are biased high in comparison to COCCON-CAMS with a mean bias of 3.72 ppm and a standard deviation of 1.80 ppm in Kiruna and with a mean bias of 3.46 ppm and a standard deviation of 1.73 ppm in Sodankylä (a summary of these statistics is listed in Table 1). The increase of bias as a function of time can be clearly seen in Figure 7. This is related to the CAMS model overestimation and is also reported by Christophe et al., 2019. The Orbiting Carbon Observatory 2 (OCO-2) satellite also provides global coverage of CO<sub>2</sub> observations. The CO<sub>2</sub> comparison between the OCO-2 satellite and the COCCON would be another subject of the future work and is not shown here.

### 3.2.2 XCH<sub>4</sub>

The correlation of XCH<sub>4</sub> between CAMS and COCCON-CAMS measurements is more scattered than that of XCO<sub>2</sub> (see Figure 8, upper panel). The R<sup>2</sup> value decreased by nearly one third to 0.6236 in Kiruna and nearly half to 0.5292 in Sodankylä.



CAMS data on average are biased high by about 0.33 ppb ( $\pm 11.93$  ppb) in Kiruna, and 7.39 ppb ( $\pm 10.92$  ppb) in Sodankylä. The most significantly high bias occurs at both sites from March 2017 to June 2017. Though CAMS profiles show better seasonal variability in CH<sub>4</sub> than the MAP profiles, they are still not perfect compared to the realistic profiles, especially during a period of strong stratospheric subsidence (see Figure 3, compared with AirCore profiles). These imperfect profile shapes of CAMS probably result in the high bias in March and April. The highest differences are found in June 2017 with 23.06 ppb in Kiruna and 29.42 ppb in Sodankylä. However, the much higher bias in June is more likely due to the bias from CAMS itself (as reported in Christophe et al., 2019), and is not found when comparing COCCON and TCCON measurements for 2017. This is because the hydroxyl radical (OH) is the primary CH<sub>4</sub> sink in the troposphere via oxidization (Lelieveld et al., 2016; Rigby et al., 2017) and its amount is generally higher in summer. Wang et al. (2019) evaluated the CAMS trace gases using aircraft observations and found an underestimation of OH concentrations in the Arctic. The underestimated concentrations of OH weakens the loss of CH<sub>4</sub> concentration in the CAMS model, which contribute to a higher amount of CH<sub>4</sub>. The only exception is found in August 2018, when COCCON-CAMS measures 14.33 ppb higher XCH<sub>4</sub> at Kiruna site and 4.54 ppb higher at Sodankylä site. Table 2 shows the monthly averaged difference of XCH<sub>4</sub> between CAMS and COCCON-CAMS at both sites in 2017 and 2018.

The comparison between S5P and COCCON-CAMS measurements shows a different situation, where the S5P satellite generally measures lower atmospheric XCH<sub>4</sub> than COCCON-CAMS, with relative bias of -0.51% in Kiruna and -0.47% in Sodankylä, respectively. The S5P XCH<sub>4</sub> observations have been validated with the measurements from the TCCON network by the S5P operational validation team and S5P XCH<sub>4</sub> exhibits a relative bias of -0.68% with respect to the TCCON XCH<sub>4</sub> values (Lambert et al., 2020). However, obvious biases are found in March and April 2019 (presenting in yellow color), when S5P measured higher XCH<sub>4</sub>. Excluding these two months measurements, S5P measures 9.69 ppb ( $\pm 20.51$  ppb) lower XCH<sub>4</sub> in Kiruna and 3.36 ppb ( $\pm 17.05$  ppb) lower in Sodankylä. Compared to the correlation between CAMS and COCCON-CAMS retrievals, the correlation between S5P and COCCON-CAMS measurements is poorer and the values of R<sup>2</sup> are nearly halved, with 0.2947 at the Kiruna site and 0.2909 at Sodankylä site. The error bar represents the standard error of mean, caused by higher standard deviation or/and lesser number of observations. Higher error bars are found at Kiruna site and this might be due to the more complex terrain at the Kiruna site where mountains are located to the west of Kiruna. For testing the resulting effects, we shifted the center of the coincidence area 50 km to the east to reduce the effects of mountains, but the higher scatters largely remain. This is further investigated by comparing the ground pressure derived from S5P to the values used by COCCON-CAMS. The altitude measured by S5P satellite ranges approximately from 220 m to 960 m in the defined area around Kiruna, while it ranges only from 118 m to 358 m in Sodankylä area. When we interpolate the S5P pressure at the two sites to the altitude of two COCCON locations separately, the correlations at both sites show good agreement when the R<sup>2</sup> is 0.9960 at Kiruna and 0.9894 at Sodankylä (see Figure 9).

### 320 3.2.3 Effects of albedo and viewing zenith angle on XCH<sub>4</sub>

The officially released S5P data also contains other parameters, like albedo retrieved in the same SWIR region and viewing zenith angle (VZA). The sensitivities of the ratio of XCH<sub>4</sub> (S5P measurements divided by COCCON) to albedo and VZA at each site are presented in Figure 10. The albedo ranges from 0.03 to 0.10 in the period of May 2018 – September 2019, showing no obvious effects on the ratio of XCH<sub>4</sub>. Both sites show similar situation with the average ratio of  $0.9949 \pm 0.0118$  in Kiruna and  $0.9953 \pm 0.0089$  in Sodankylä. The VZA of S5P satellite changes approximately from 2° to 60° in the available time period. The sensitivity analysis shows that there are negligible changes in measuring XCH<sub>4</sub> when VZA changes.

### 3.4 Comparison of gradients measurement at two sites between CAMS/S5P and COCCON-CAMS

To study the capability to measure the gradients of XCO<sub>2</sub> ( $\Delta XCO_2$ ) and XCH<sub>4</sub> ( $\Delta XCH_4$ ) on regional scales (between Kiruna and Sodankylä), the  $\Delta XCO_2$  between CAMS and COCCON-CAMS is presented in Figure 11 and the  $\Delta XCH_4$  between CAMS and COCCON-CAMS and between S5P and COCCON are presented in Figure 12.

The  $\Delta XCO_2$  comparison between CAMS and COCCON-CAMS show a much poorer correlation ( $R^2 = 0.3322$ ) than the comparison of XCO<sub>2</sub> between two sites ( $R^2 = 0.9643$ , mean value of both sites over the whole measurements), as to be expected: the  $\Delta XCO_2$  signals are very small (on the order of 0.5 ppm). Still, a positive correlation in  $\Delta XCO_2$  and similar amplitudes are found in CAMS and COCCON-CAMS data. If the comparison would be dominated either by horizontal smoothing effects due to the limited resolution of the model (would reduce the spread along the y-axis of Figure 12) or by the uncertainties of the COCCON measurement (would amplify the spread along the x-axis of Figure 12), the variability ranges would differ significantly.

For  $\Delta XCH_4$  the comparison between CAMS and COCCON-CAMS measurements (Figure 12 left panel) shows a better correlation ( $R^2 = 0.4117$ ) than that between S5P and COCCON-CAMS (Figure 12 right panel). S5P results show higher scattering, resulting in a poorer correlation ( $R^2 = 0.2078$ ) with COCCON-CAMS. This nearly half difference is probably due to the smaller number of the coincident measurements between S5P and COCCON. There are only 50 coincident measurements between S5P and COCCON in total, covering 17 days in 2018 and 16 days in 2019, while there are 86 coincident measurements between CAMS and COCCON in total, covering 17 days in 2017, 29 days in 2018 and 26 days in 2019. Figure 10, middle panel shows the agreement between CAMS and COCCON for the subset of days with S5P observations. Appendix Table A.1 lists the statistics of S5P data coincident with COCCON-CAMS data when S5P overpasses both sites in one day. The correlation in the restricted days is similar to the correlation between S5P and COCCON. CAMS, COCCON and S5P seem to be able to detect methane gradients on regional scales.

## 4 Conclusions

In this study, two COCCON instruments are used to perform multi-year measurements at Kiruna and Sodankylä. The instruments demonstrate useful performance for accuracy, measuring gradients of column-averaged greenhouse gas

abundances on regional scales. We first compared the profiles derived from CAMS with the TCCON official profiles (MAP). For CO<sub>2</sub> vertical profiles, both CAMS and MAP present similar seasonal variations, though CAMS profiles show higher vertical variability and more obvious seasonal changes over the whole time period of analysis. The main differences between them dominate in the troposphere, with peak-to-peak variability of about 25 ppm. However, the CH<sub>4</sub> profiles derived from CAMS show a significant seasonal change, especially in the stratosphere, while MAP estimates suggest less variability of CH<sub>4</sub> profiles in the course of the year. The CH<sub>4</sub> difference reaches up to 1 ppm at around 25 km height in April 2018. The AirCore balloon launches were performed as an auxiliary activity during the Finland campaign. CAMS profiles show a better agreement with the in-situ measurements derived from AirCore launches than the official TCCON MAP a-priori profiles. Especially, CAMS presents better profiles for CH<sub>4</sub> in April, while the MAP profiles do not show the stratospheric subsidence caused by the polar vortex.

MAP and CAMS profiles are used as a-priori information in processing COCCON and TCCON data at the Sodankylä and Kiruna sites. The correlation between COCCON data (COCCON-CAMS) and TCCON data (TCCON-CAMS) improved for both XCO<sub>2</sub> and XCH<sub>4</sub> when using CAMS a-priori profiles. R<sup>2</sup> increased to 0.9925 in 2017 and 0.9863 in 2018 for XCO<sub>2</sub> and 0.9708 in 2017 and 0.9635 in 2018 for XCH<sub>4</sub>. The obvious biases in April 2017 when comparing COCCON to the TCCON data (using MAP profiles) is mainly caused by the polar vortex. However, these outliers disappeared in the data comparison when data are processed with CAMS profiles. Different instruments show different sensitivity to the a-priori profiles and the CAMS profiles might be a good choice to improve the data accuracy.

We also compared XCO<sub>2</sub> and XCH<sub>4</sub> between COCCON-CAMS and CAMS and XCH<sub>4</sub> between COCCON-CAMS and the S5P satellite in Kiruna and Sodankylä. The XCO<sub>2</sub> comparisons between COCCON-CAMS and CAMS at both sites show similar and good agreement with a mean bias of 3.72 ppm, standard deviation of 1.80 ppm, and R<sup>2</sup> of 0.9530 in Kiruna; with a mean bias of 3.46 ppm, standard deviation of 1.73 ppm, and R<sup>2</sup> of 0.9756 in Sodankylä. The correlations of XCH<sub>4</sub> between COCCON-CAMS and CAMS are relatively poorer than the XCO<sub>2</sub> correlations with R<sup>2</sup> of 0.6236 in Kiruna and 0.4673 in Sodankylä. CAMS mostly overestimated XCH<sub>4</sub> in comparison to COCCON-CAMS (approximately 0.33 ppb (±11.93 ppb) higher XCH<sub>4</sub> in Kiruna, and 7.39 ppb (±10.92 ppb) higher XCH<sub>4</sub> in Sodankylä). In contrast, the S5P satellite generally measures lower atmospheric XCH<sub>4</sub> than COCCON, with a mean bias of 9.69 ppb, standard deviation of 20.51 ppb and R<sup>2</sup> of 0.2947 in Kiruna; a mean bias of 3.36 ppb, standard deviation of 17.05 ppb and R<sup>2</sup> of 0.2909 in Sodankylä. In addition, no obvious variability is found when albedo and viewing zenith angle of S5P changes.

When studying the possibility of measuring gradients of XCO<sub>2</sub> and XCH<sub>4</sub> for the region between Kiruna and Sodankylä, we compared the COCCON-CAMS results with CAMS and S5P (only for XCH<sub>4</sub>). For ΔXCO<sub>2</sub> CAMS show higher values and has a R<sup>2</sup> value of 0.3322. For ΔXCH<sub>4</sub> COCCON shows a better correlation with the CAMS (slope = 0.6482, R<sup>2</sup> = 0.4117) than with the S5P (slope = 0.5791, R<sup>2</sup> = 0.2078). When limiting the COCCON-CAMS and CAMS data to the S5P overpass days, the correlation of ΔXCH<sub>4</sub> between them decreased (slope = 0.5304, R<sup>2</sup> = 0.2242) and is close to the correlation between S5P and COCCON-CAMS. The lower correlation between COCCON-CAMS and S5P results is probably due to the smaller dataset. COCCON observations can be used for the quantification of sources and sinks of greenhouse gases and for the validation of

385 space borne observations. To our knowledge, this is the first published study using COCCON spectrometers for the validation  
of XCH<sub>4</sub> measurements collected by S5P.

390

*Data availability.* The data is accessible by contacting the corresponding author (qiansi.tu@kit.edu). The S5P dataset is publicly available from <https://s5phub.copernicus.eu/dhus/#/home>. The Aura/MLS data set is publicly available from <https://disc.gsfc.nasa.gov/datasets?page=1&keywords=aura>.

395

**Table 1.** A summary of statistics between two paired datasets is listed in terms of averaged bias and standard deviation (in brackets: R<sup>2</sup> values).

|                        |           | CAMS – COCCON-CAMS    | S5P – COCCON           |
|------------------------|-----------|-----------------------|------------------------|
| XCO <sub>2</sub> (ppm) | Kiruna    | 3.72 ± 1.80 (0.9530)  | –                      |
|                        | Sodankylä | 3.46 ± 1.73 (0.9756)  | –                      |
| XCH <sub>4</sub> (ppb) | Kiruna    | 0.33 ± 11.93 (0.6236) | -9.69 ± 20.51 (0.2947) |
|                        | Sodankylä | 7.39 ± 10.92 (0.5292) | -3.36 ± 17.05 (0.2909) |

400

**Table 2.** Monthly averaged difference and standard deviation of XCH<sub>4</sub> (in ppb) between CAMS and COCCON-CAMS at two sites in 2017 and 2018.

|           | Kiruna        |              | Sodankylä     |              |
|-----------|---------------|--------------|---------------|--------------|
|           | 2017          | 2018         | 2017          | 2018         |
| February  | --            | -10.60 ± 0.0 | --            | --           |
| March     | -6.75 ± 7.18  | -6.85 ± 6.60 | -10.43 ± 3.58 | -7.88 ± 4.56 |
| April     | -8.37 ± 5.46  | -0.63 ± 3.90 | -12.20 ± 5.01 | -5.42 ± 4.60 |
| May       | -11.02 ± 5.10 | -3.12 ± 5.81 | -19.53 ± 6.47 | -6.12 ± 6.47 |
| June      | -23.06 ± 8.98 | -4.40 ± 4.63 | -29.42 ± 6.81 | -6.63 ± 4.00 |
| July      | --            | -4.71 ± 7.68 | -10.66 ± 9.86 | -9.22 ± 7.97 |
| August    | -0.15 ± 1.31  | 14.33 ± 3.35 | -5.62 ± 4.48  | 4.54 ± 10.02 |
| September | 3.22 ± 6.06   | 6.45 ± 3.57  | -3.13 ± 7.86  | -0.79 ± 0.29 |

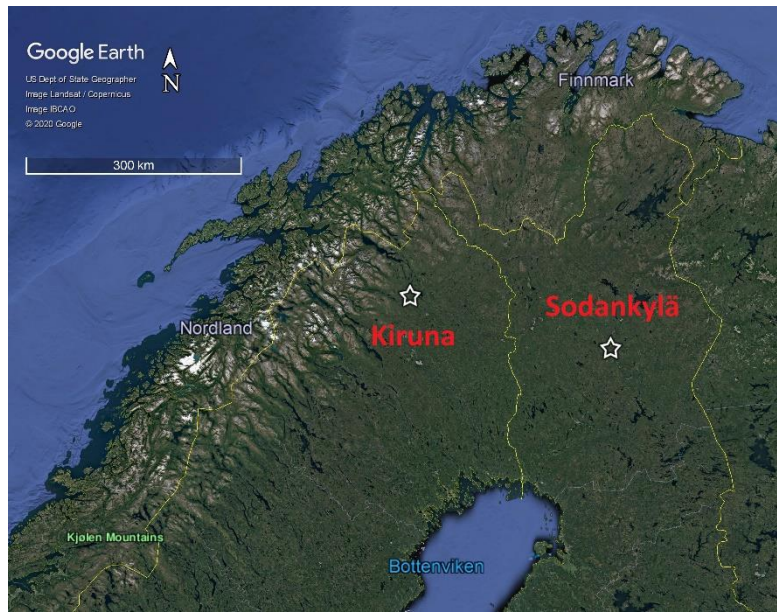

405

**Figure 1.** Map showings locations of Kiruna and Sodankylä sites in this study.

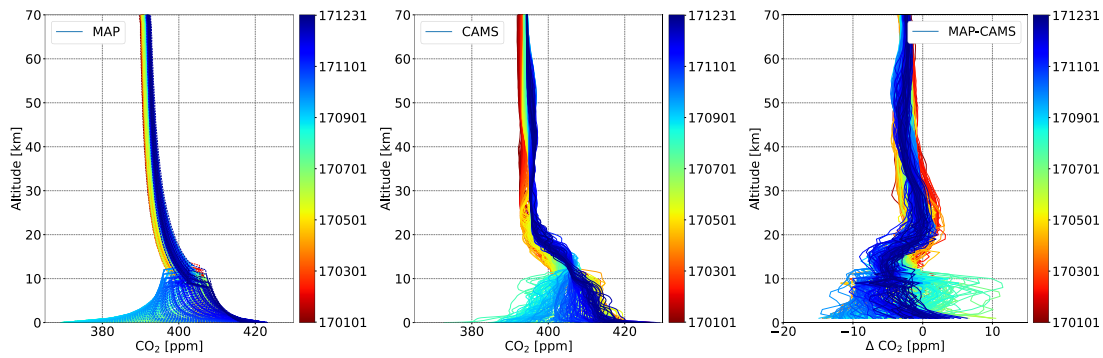

2017 CO<sub>2</sub>

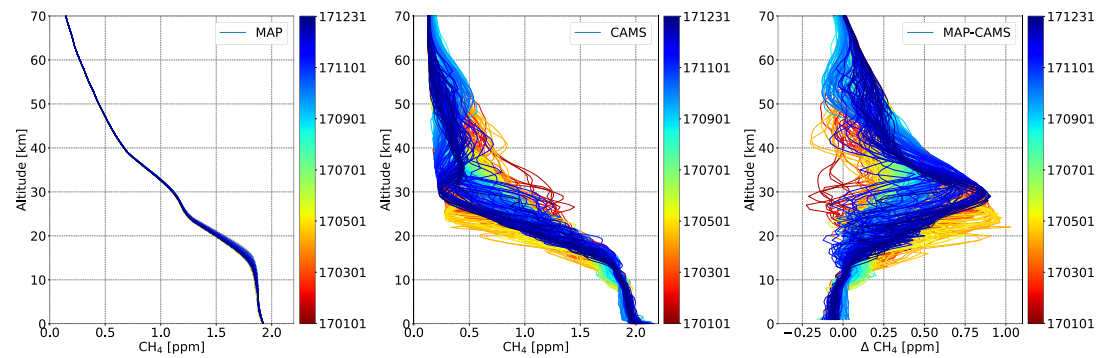

2017 CH<sub>4</sub>

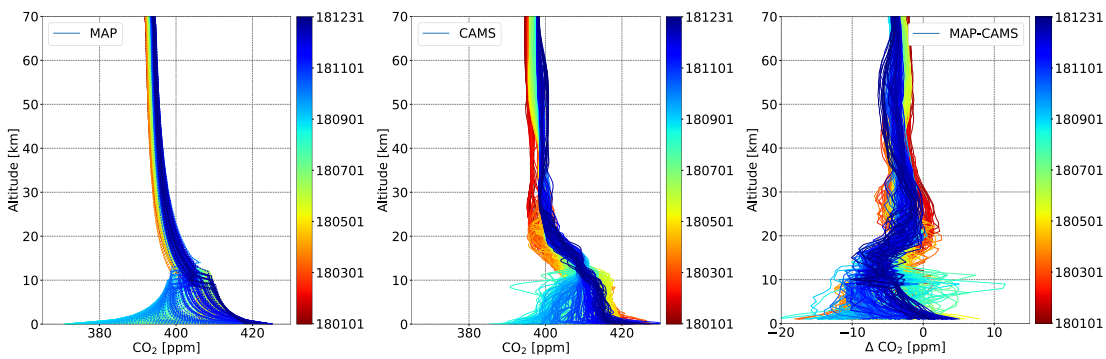

2018 CO<sub>2</sub>

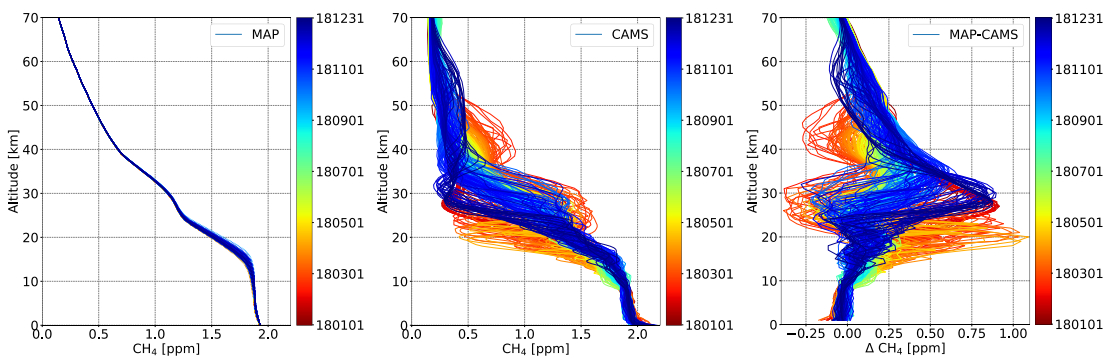

2018 CH<sub>4</sub>

410

**Figure 2.** Profiles of MAP (left columns), CAMS (middle columns) and the difference of MAP-CAMS (right columns) for CO<sub>2</sub> and CH<sub>4</sub> in 2017 and 2018.

2017

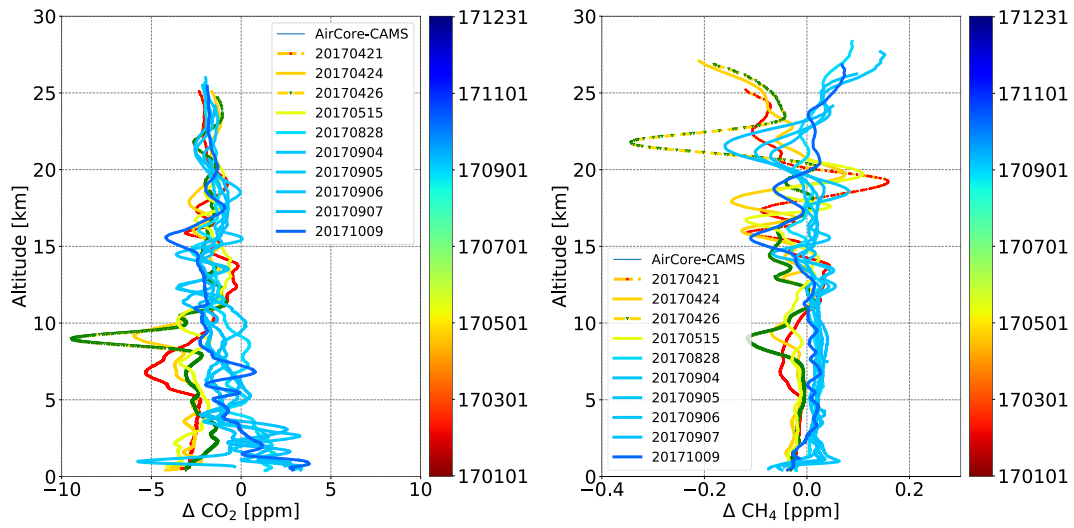

415

2018

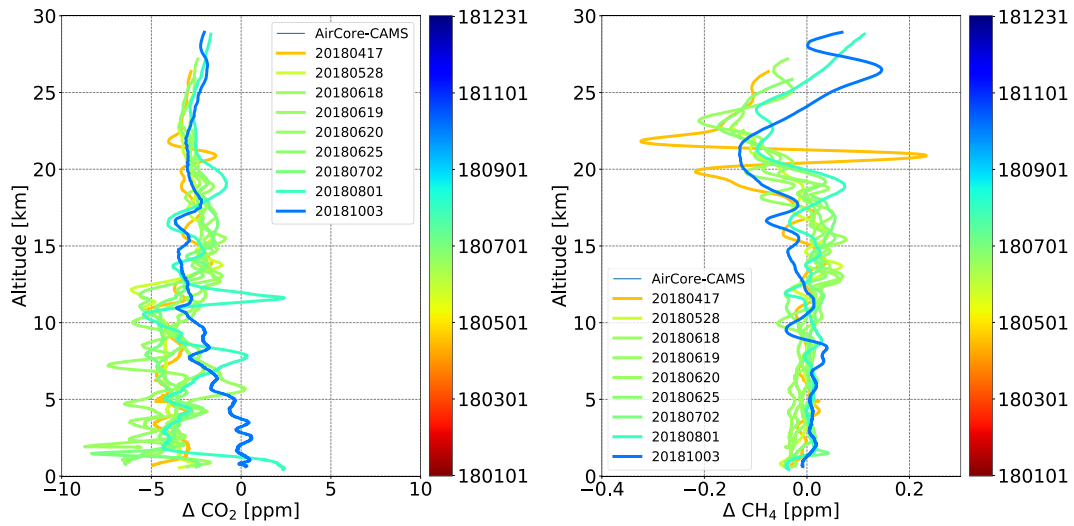

Figure 3. Differences between AirCore and CAMS for CO<sub>2</sub> (left) and CH<sub>4</sub> (right) profiles in 2017 and 2018.

420

2017

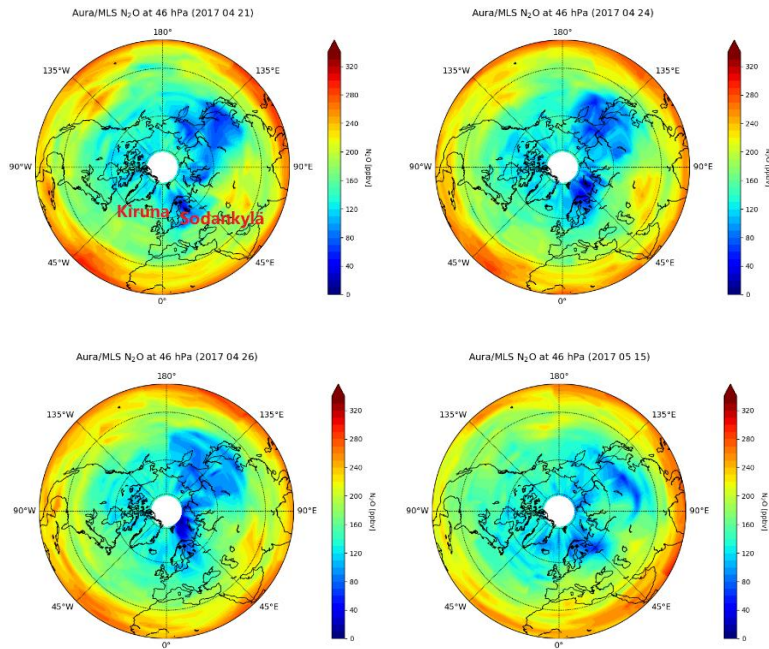

2018

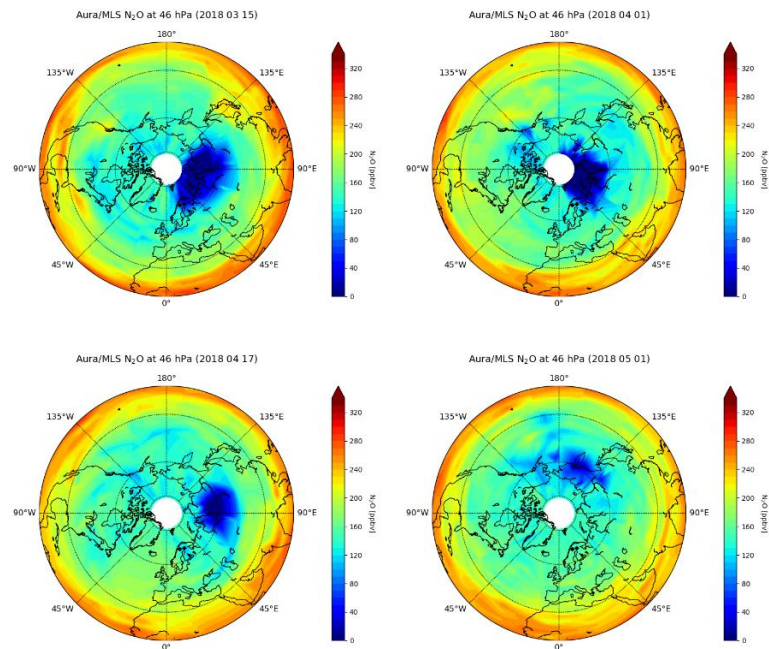

425

**Figure 4.** Development of polar vortex in four days in April – May 2017 and four days in March – May 2018, using N<sub>2</sub>O retrieved from Aura/MLS satellite as a tracer. The two sites are denoted with diamond symbols (left one for Kiruna and right one for Sodankylä) in each subplot.



430

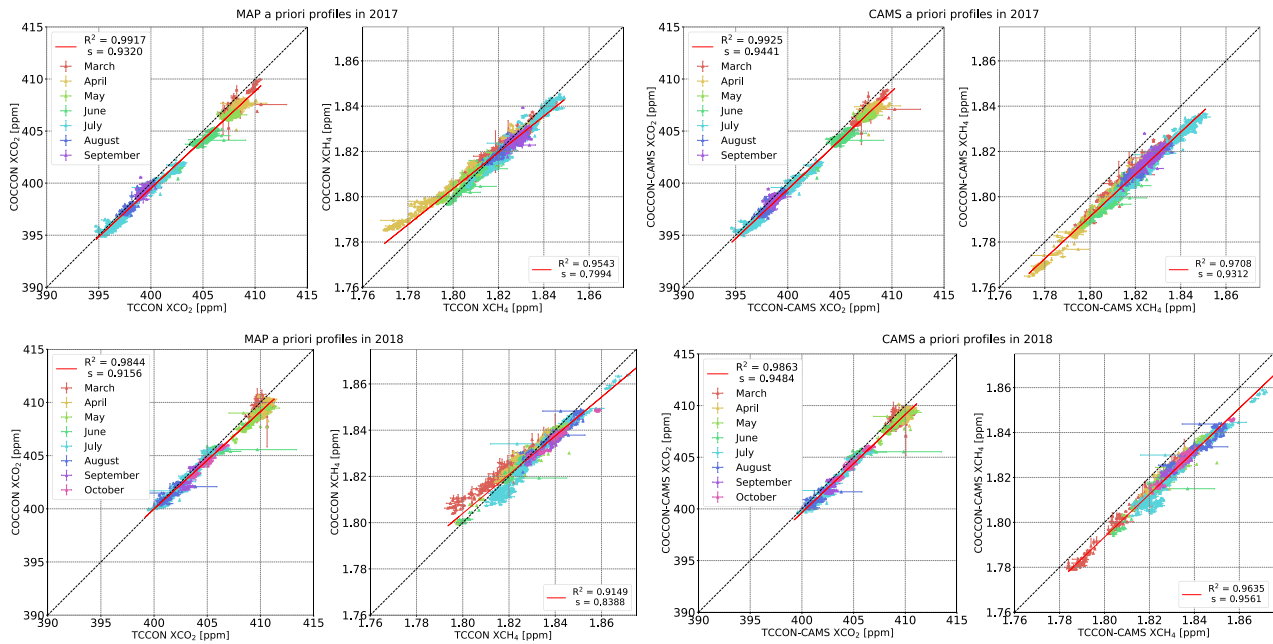

435

**Figure 5.** Comparisons of COCCON and TCCON data in 2017 and 2018 with using MAP (left) and CAMS (right) profiles as prior profiles. The slope of the relationship is represented by “s” in the figure, and the coefficient of determination is represented by “R<sup>2</sup>”. Each point represents a 10-minute average of coincident between COCCON and TCCON measurements. The red line represents the best fit line and the black line is the one-to-one line.

440

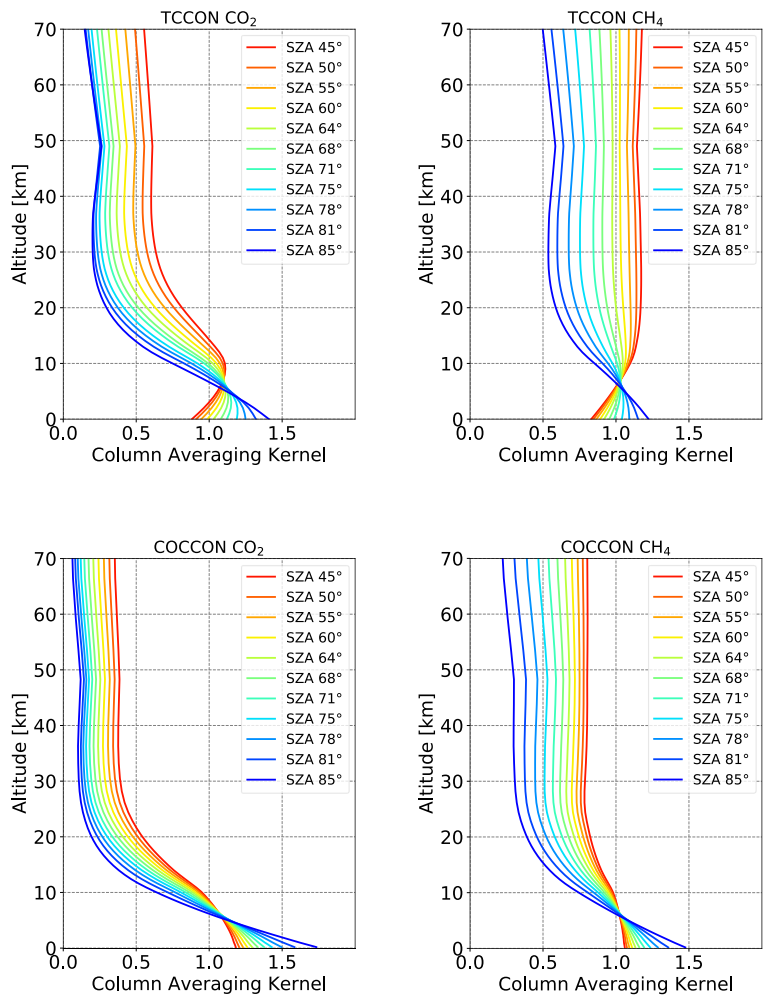

445 **Figure 6.** An example of the averaging kernels comparison at different SZA for the TCCON and COCCON instrument performed at June 8, 2017. The COCCON instrument are generally less sensitive to changes of SZA.

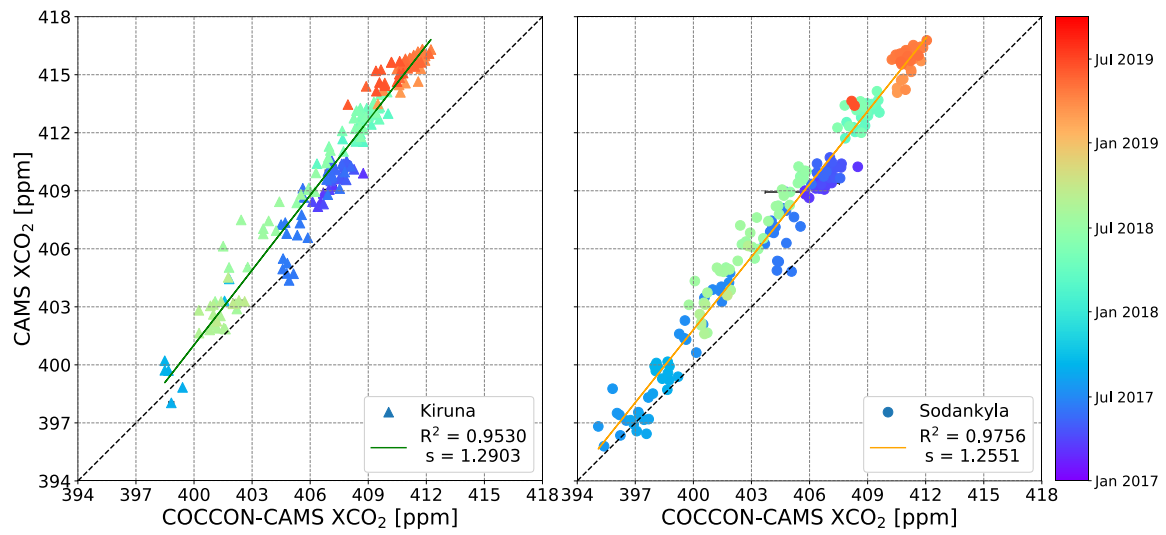

450 **Figure 7.** XCO<sub>2</sub> comparison between CAMS and COCCON-CAMS in Kiruna (left) and Sodankylä (right). Every point represents hourly average value of coincident CAMS and COCCON-CAMS measurements. The annotations follow those in Figure 5.

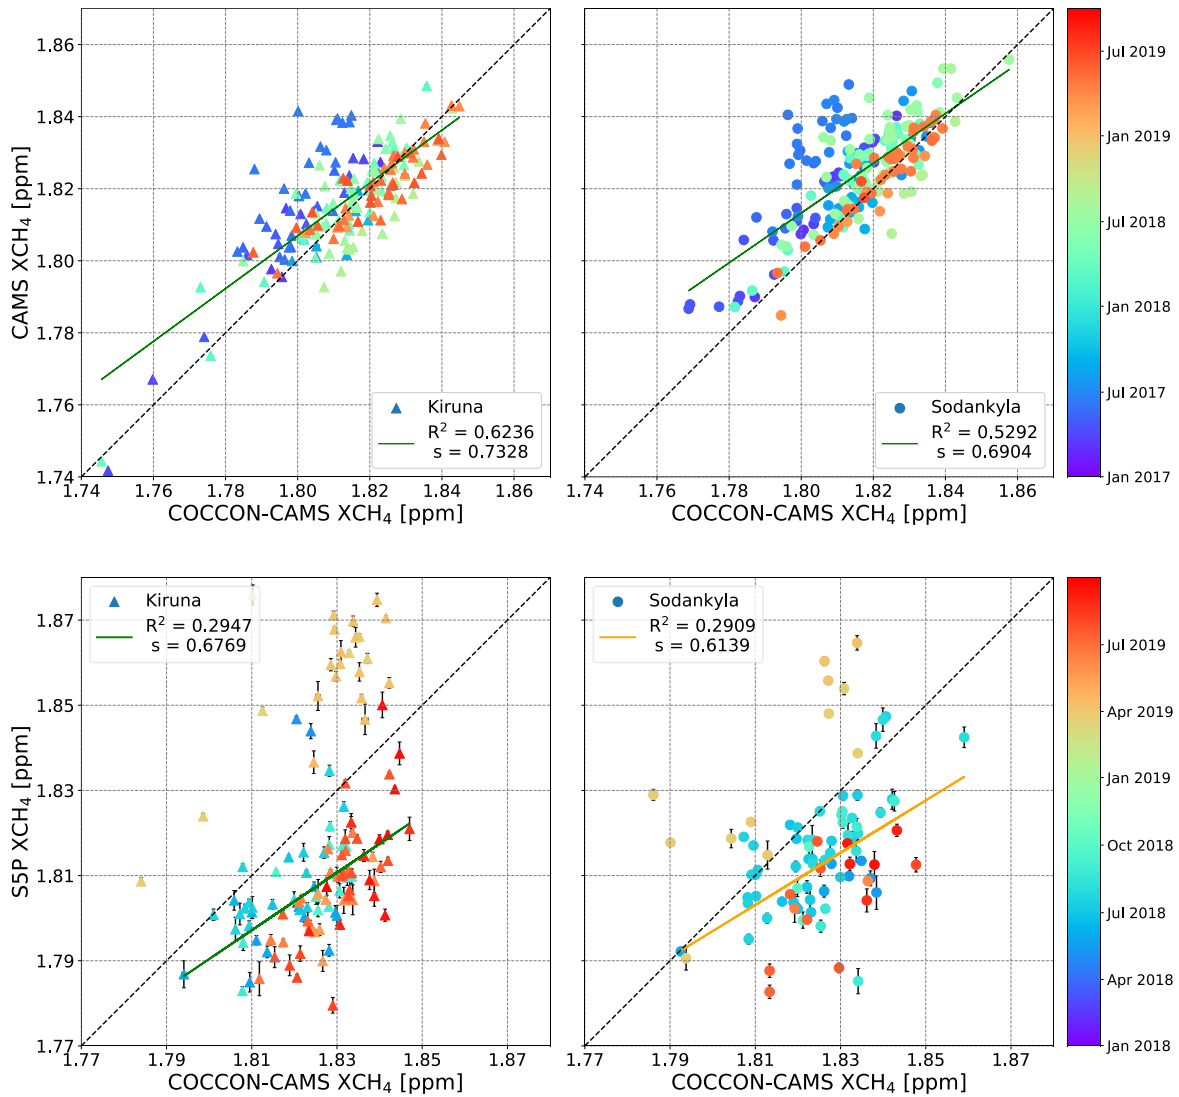

455

**Figure 8.** XCH<sub>4</sub> comparison between CAMS (top panel) or S5P (lower panel) and COCCON in Kiruna (left) and Sodankylä (right). Every point represents coincident CAMS and COCCON-CAMS measurements. The annotations follow those in Figure 5. Note that the fitting line derived from the data exclude the March and April, 2019. It is noted that the color bar starts from 2018 rather than 2017 for better distinguishing data.

460

465

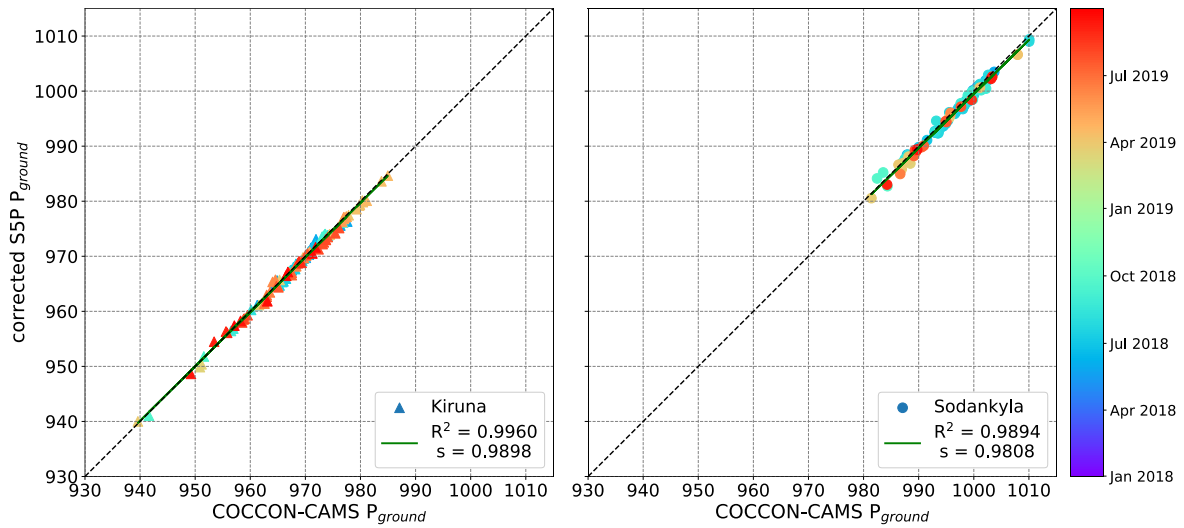

**Figure 9.** Ground pressure comparison between S5P and COCCON in Kiruna (left) and Sodankylä (right). The S5P pressure is interpolated to the height of COCCON. Every point represents coincident S5P and COCCON measurements. The annotations follow those in Figure 5. It is noted that the color bar starts from 2018 rather than 2017 for better distinguishing data.

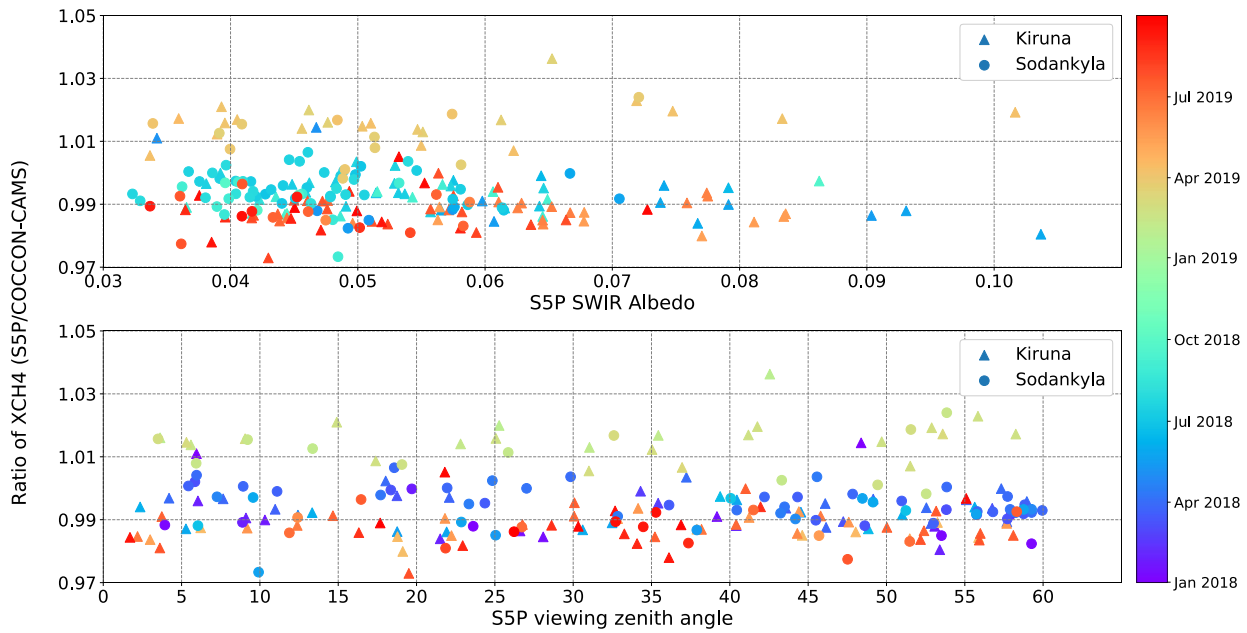

**Figure 10.** The ratio of XCH<sub>4</sub> (S5P divided by COCCON results) at two different sites as a function of albedo (top) and viewing zenith angle (bottom) from S5P. It is noted that the color bar starts from 2018 rather than 2017 for better distinguishing data.

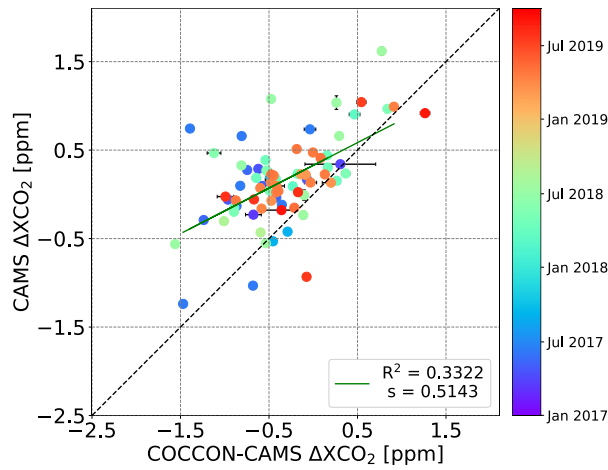

475 **Figure 11.** Difference of XCO<sub>2</sub> measured between Kiruna and Sodankylä. Plot showing the comparison between CAMS and COCCON. The annotations follow those in Figure 5.

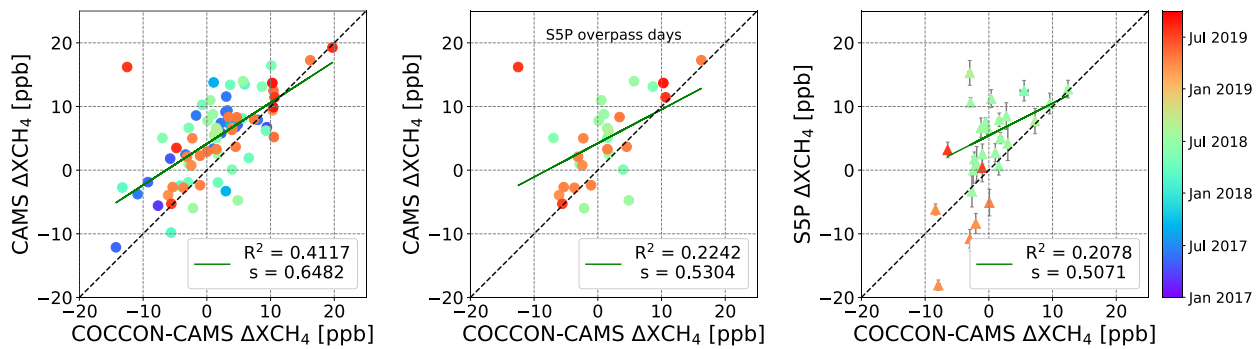

**Figure 12.** Difference of XCH<sub>4</sub> measured between Kiruna and Sodankylä. Left panel: plot showing the comparison between CAMS and COCCON. Middle panel: plot showing the comparison between CAMS and COCCON during the S5P overpass days. Right panel: plot showing the comparison between S5P and COCCON. The annotations follow those in Figure 5.

480

485

## Appendix

**Table A. 1** the statistics of S5P data coincident with COCCON data when S5P overpasses both sites in one day.

| Overpass date | Overpass time | Kiruna              |            | Sodankylä           |            |
|---------------|---------------|---------------------|------------|---------------------|------------|
|               |               | No. of Measurements | Error      | No. of measurements | Error      |
| 2018-05-11    | 09:46         | 1                   | --         | 30                  | 9.5631E-4  |
| 2018-05-25    | 12:04         | 2                   | 0.00129    | 1                   | 9.7769E-4  |
| 2018-05-29    | 10:48         | 11                  | 0.00319    | 44                  | 9.3367E-4  |
| 2018-05-31    | 10:10         | 21                  | 0.00236    | 19                  | 0.0014     |
| 2018-07-02    | 08:31         | 58                  | 0.00113    | 110                 | 8.44187E-4 |
|               | 10:10         | 243                 | 5.48425E-4 | 404                 | 3.25961E-4 |
|               | 11:51         | 89                  | 9.28037E-4 | 112                 | 6.38277E-4 |
| 2018-07-10    | 09:21         | 56                  | 0.00134    | 190                 | 5.23952E-4 |
| 2018-07-12    | 08:43         | 29                  | 0.00211    | 61                  | 0.00126    |
|               | 10:23         | 200                 | 5.9486E-4  | 310                 | 4.79266E-4 |
|               | 12:04         | 55                  | 0.00105    | 27                  | 9.43214E-4 |
| 2018-07-13    | 08:25         | 27                  | 0.00152    | 16                  | 0.00144    |
|               | 10:04         | 72                  | 0.00113    | 41                  | 0.00111    |
|               | 11:45         | 6                   | 0.00195    | 4                   | 6.71639E-4 |
| 2018-07-16    | 09:08         | 14                  | 0.00256    | 115                 | 8.18677E-4 |
|               | 10:48         | 76                  | 9.76244E-4 | 228                 | 4.38376E-4 |
| 2018-07-17    | 08:50         | 58                  | 0.00118    | 92                  | 9.55501E-4 |
|               | 10:29         | 85                  | 8.76049E-4 | 325                 | 4.04797E-4 |
| 2018-07-18    | 08:31         | 31                  | 0.00132    | 92                  | 9.66493E-4 |
|               | 10:11         | 112                 | 7.06507E-4 | 267                 | 5.33282E-4 |
|               | 11:51         | 8                   | 0.0028     | 16                  | 0.00116    |
| 2018-07-19    | 08:13         | 17                  | 0.00256    | 70                  | 8.93628E-4 |
|               | 09:52         | 6                   | 0.00299    | 386                 | 3.26368E-4 |
| 2018-07-20    | 09:33         | 40                  | 0.00131    | 280                 | 4.6468E-4  |
| 2018-07-27    | 09:02         | 1                   | --         | 107                 | 8.6095E-4  |
| 2018-08-08    | 10:17         | 13                  | 0.00179    | 2                   | 0.00338    |
| 2018-08-31    | 09:46         | 27                  | 0.00177    | 121                 | 9.12589E-4 |
|               | 11:26         | 8                   | 0.00249    | 7                   | 0.00172    |

|            |       |     |         |     |            |
|------------|-------|-----|---------|-----|------------|
| 2018-09-03 | 10:30 | 32  | 0.00172 | 143 | 9.18697E-4 |
| 2019-03-19 | 10:36 | 231 | 0.00060 | 24  | 0.00146    |
| 2019-03-22 | 09:40 | 182 | 0.00070 | 452 | 0.00041    |
|            | 11:20 | 85  | 0.0012  | 229 | 0.00748    |
| 2019-03-26 | 10:05 | 283 | 0.00067 | 430 | 0.00060    |
| 2019-04-05 | 08:38 | 82  | 0.00101 | 139 | 0.00104    |
|            | 10:17 | 358 | 0.00060 | 468 | 0.00052    |
| 2019-04-05 | 11:58 | 106 | 0.00114 | 1   | --         |
| 2019-04-08 | 09:21 | 38  | 0.00120 | 21  | 0.00170    |
| 2019-04-10 | 12:04 | 56  | 0.00125 | 1   | --         |
| 2019-04-14 | 09:09 | 16  | 0.00542 | 1   | --         |
|            | 10:49 | 22  | 0.00339 | 1   | --         |
| 2019-04-15 | 08:50 | 59  | 0.00269 | 1   | --         |
| 2019-04-16 | 08:31 | 1   | --      | 1   | --         |
|            | 10:11 | 4   | 0.00504 | 1   | --         |
| 2019-04-18 | 09:34 | 26  | 0.00267 | 1   | --         |
|            | 11:14 | 3   | 0.01216 | 1   | --         |
| 2019-04-26 | 10:23 | 2   | 0.00477 | 1   | --         |
| 2019-06-07 | 08:56 | 4   | 0.00351 | 81  | 0.00102    |
| 2019-07-12 | 09:39 | 6   | 0.00212 | 191 | 0.00063    |
| 2019-07-22 | 09:52 | 56  | 0.00097 | 125 | 0.00076    |
| 2019-07-25 | 12:16 | 2   | 0.00487 | 1   | --         |
| 2019-09-19 | 09:46 | 2   | 0.00067 | 2   | 0.00309    |

490

495



500 **Table A. 2** the date, start time and end time of AirCore launches at Sodankylä site

| Date       | start time | end time |
|------------|------------|----------|
| 2017-04-21 | 07:39      | 08:23    |
| 2017-04-24 | 15:13      | 16:13    |
| 2017-04-26 | 09:16      | 10:00    |
| 2017-05-15 | 09:33      | 10:25    |
| 2017-08-28 | 09:13      | 10:10    |
| 2017-09-04 | 09:16      | 10:04    |
| 2017-09-05 | 09:23      | 10:06    |
| 2017-09-06 | 09:10      | 09:49    |
| 2017-09-07 | 08:52      | 09:40    |
| 2017-10-09 | 09:49      | 10:50    |
| 2018-04-17 | 10:23      | 11:07    |
| 2018-05-28 | 08:46      | 09:35    |
| 2018-06-18 | 08:53      | 09:30    |
| 2018-06-19 | 15:00      | 15:39    |
| 2018-06-20 | 10:23      | 11:03    |
| 2018-06-25 | 10:14      | 10:52    |
| 2018-07-02 | 10:55      | 12:25    |
| 2018-08-01 | 11:31      | 12:28    |
| 2018-10-03 | 07:48      | 08:47    |

*Author contributions.* Frank Hase, Thomas Blumenstock and Qiansi Tu developed the research question. Qiansi Tu wrote the manuscript and performed the data analysis with support from Frank Hase, Thomas Blumenstock and Mahesh Kumar Sha. Qiansi Tu, Thomas Blumenstock, Pauli Heikkinen, Rigel Kivi and Uwe Raffalski took an active part in the field campaign by operating the COCCON spectrometers and collecting data. Rigel Kivi and Pauli Heikkinen also operate the TCCON station at Sodankylä site and provided data. Jochen Landgraf, Alba Lorente and Tobias Borsdorff offered technical support in analyzing S5P satellite data. Huilin Chen provided the AirCore data. **Jia Chen's group developed the automated enclosure and the protection system for the EM27/SUN instruments. Jia Chen and Florian Dietrich offered the technical support of the enclosure for the COCCON instrument during the campaign.** All authors discussed the results and contributed to the final manuscript.

510

*Competing interests.* The authors declare that they have no conflict of interest.

515 *Acknowledgements.*

We thank Xiaobo Yang in the Copernicus User Support Team at ECMWF providing the CAMS model data, which were generated using Copernicus Atmosphere Monitoring Service (2017 - 2019) information. We also thank Anna Agustí-Panareda, Michela Giusti and Anabelle Guillory in the Copernicus User Support Team for providing comments about the CAMS model data. We would like to thank MLS team for providing the N<sub>2</sub>O data and Farahnaz Khosrawi for producing the N<sub>2</sub>O figures. The work presented here overlaps with the Fiducial Reference Measurements for Ground-Based Infrared Greenhouse Gas Observations (FRM4GHG) project funded by European Space Agency under the grant agreement number ESA-IPL-POE-LG-cl-LE-2015-1129. **We also acknowledge ESA support through the COCCON-PROCEEDS project.** The AirCore launches are partly supported by the EU RINGO project. Jia Chen and Florian Dietrich acknowledge the funding by Technische Universität München – Institute for Advanced Study, funded by the German Excellence Initiative and the European Union Seventh Framework Programme under grant agreement no. 291763 and by DFG under Grant 419317138.

525

The article processing charges for this open-access publication were covered by a Research Centre of the Helmholtz Association.

530 **References**

- Agustí-Panareda, A., Massart, S., Chevallier, F., Boussetta, S., Balsamo, G., Beljaars, A., Ciais, P., Deutscher, N. M., Engelen, R., Jones, L., Kivi, R., Paris, J.-D., Peuch, V.-H., Sherlock, V., Vermeulen, A. T., Wennberg, P. O., and Wunch, D.: Forecasting global atmospheric CO<sub>2</sub>, *Atmos. Chem. Phys.*, 14, 11959–11983, <https://doi.org/10.5194/acp-14-11959-2014>, 2014.
- 535 Apituley, A., Pedergnana, M., Sneep, M., Veeffkind, J.P., Loyola, D. and Hasekamp, O.: Sentinel-5 precursor/TROPOMI Level 2 Product User Manual Methane, source: SRON/KNMI, ref: SRON-S5P-LEV2-MA-001, issue: 0.11.6, date: 2017-06-24.
- Bovensmann, Heinrich & Burrows, John & Buchwitz, M. & Frerick, Johannes & Noel, Suresh & Rozanov, V. & Chance, & Kelly, & Goede, A. (1999). SCIAMACHY: mission objectives and measurement modes. *J. Atmos. Sci.* 56. 10.1175/1520-0469(1999)056<0127:SMOAMM>2.0.CO;2.
- 540 Butz, A., Galli, A., Hasekamp, O., Landgraf, J., Tol, P., and Aben, I.: TROPOMI aboard Sentinel-5 Precursor: Prospective performance of CH<sub>4</sub> retrievals for aerosol and cirrus loaded atmospheres, *Remote Sens. Environ.*, 120, 267–276, <https://doi.org/10.1016/j.rse.2011.05.030>, 2012.
- Butz, A., Dinger, A. S., Bobrowski, N., Kostinek, J., Fieber, L., Fischerkeller, C., Giuffrida, G. B., Hase, F., Klappenbach, F., Kuhn, J., Lübcke, P., Tirpitz, L., and Tu, Q.: Remote sensing of volcanic CO<sub>2</sub>, HF, HCl, SO<sub>2</sub>, and BrO in the downwind
- 545 plume of Mt. Etna, *Atmos. Meas. Tech.*, 10, 1–14, <https://doi.org/10.5194/amt-10-1-2017>, 2017.
- Chen, J., Viatte, C., Hedelius, J. K., Jones, T., Franklin, J. E., Parker, H., Gottlieb, E. W., Wennberg, P. O., Dubey, M. K., and Wofsy, S. C.: Differential column measurements using compact solar-tracking spectrometers, *Atmos. Chem. Phys.*, 16, 8479–8498, <https://doi.org/10.5194/acp-16-8479-2016>, 2016.
- Christophe, Y., M. Ramonet, A. Wagner, M. Schulz, H. J. Eskes, S. Basart, A. Benedictow, Y. Bennouna, A.-M. Blechschmidt,
- 550 S. Chabrillat, E. Cuevas, A. El-Yazidi, H. Flentje, K.M. Hansen, U. Im, J. Kapsomenakis, B. Langerock, A. Richter, N. Sudarchikova, V. Thouret, T. Warneke, C. Zerefos, Validation report of the CAMS near-real-time global atmospheric composition service: Period March - May 2019, Copernicus Atmosphere Monitoring Service (CAMS) report, CAMS84\_2018SC1\_D1.1.1\_MAM2019\_v1.pdf, September 2019, doi:10.24380/1t4q-1h53, 2019.
- Dietrich F. and Chen J.: Portable Automated Enclosure for a Spectrometer Measuring Greenhouse Gases, *Geophysical Research Abstracts*, Vol. 20, EGU2018-16281-1, doi: 10.13140/RG.2.2.11591.14248, 2018.
- 555 Frey, M., Hase, F., Blumenstock, T., Groß, J., Kiel, M., Mengistu Tsidu, G., Schäfer, K., Sha, K. M., and Orphal, J.: Calibration and instrumental line shape characterization of a set of portable FTIR spectrometers for detecting greenhouse gas emissions, *Atmos. Meas. Tech.*, 8, 3047–3057, doi:10.5194/amt-8-3047-2015, 2015.
- Frey, M., Sha, M. K., Hase, F., Kiel, M., Blumenstock, T., Harig, R., Surawicz, G., Deutscher, N. M., Shiomi, K., Franklin, J.
- 560 E., Bösch, H., Chen, J., Grutter, M., Ohyama, H., Sun, Y., Butz, A., Mengistu Tsidu, G., Ene, D., Wunch, D., Cao, Z., Garcia, O., Ramonet, M., Vogel, F., and Orphal, J.: Building the Collaborative Carbon Column Observing Network

- (COCCON): long-term stability and ensemble performance of the EM27/SUN Fourier transform spectrometer, *Atmos. Meas. Tech.*, 12, 1513–1530, <https://doi.org/10.5194/amt-12-1513-2019>, 2019.
- 565 Gisi, M., Hase, F., Dohe, S., Blumenstock, T., Simon, A., and Keens, A.: XCO<sub>2</sub>-measurements with a tabletop FTS using solar absorption spectroscopy, *Atmos. Meas. Tech.*, 5, 2969–2980, doi:10.5194/amt-5-2969-2012, 2012.
- GLOBALVIEW-CO<sub>2</sub>: Cooperative Atmospheric Data Integration Project – Carbon Dioxide, CD-ROM, NOAA GMD, Boulder, Colorado, 2006.
- Hase, F., Blumenstock, T., and Paton-Walsh, C.: Analysis of the instrumental line shape of high-resolution fourier transform IR spectrometers with gas cell measurements and new retrieval software., *Appl. Opt.*, 38, 3417–3422, doi:10.1364/AO.38.003417, 1999.
- 570 Hase, F., J.W. Hannigan, M.T. Coffey, A. Goldman, M. Höpfner, N.B. Jones, C.P. Rinsland, S.W. Wood: Intercomparison of retrieval codes used for the analysis of high-resolution, ground-based FTIR measurements, *Journal of Quantitative Spectroscopy & Radiative Transfer* 87, 25–52, 2004.
- Hedelius, J. K., Viatte, C., Wunch, D., Roehl, C. M., Toon, G. C., Chen, J., Jones, T., Wofsy, S. C., Franklin, J. E., Parker, H., 575 Dubey, M. K., and Wennberg, P. O.: Assessment of errors and biases in retrievals of XCO<sub>2</sub>, XCH<sub>4</sub>, XCO, and XN<sub>2</sub>O from a 0.5 cm<sup>-1</sup> resolution solar-viewing spectrometer, *Atmos. Meas. Tech.*, 9, 3527–3546, <https://doi.org/10.5194/amt-9-3527-2016>, 2016.
- Hedelius, J. K., Parker, H., Wunch, D., Roehl, C. M., Viatte, C., Newman, S., Toon, G. C., Podolske, J. R., Hillyard, P. W., Iraci, L. T., Dubey, M. K., and Wennberg, P. O.: Intercomparability of XCO<sub>2</sub> and XCH<sub>4</sub> from the United States TCCON sites, 580 *Atmos. Meas. Tech.*, 10, 1481–1493, <https://doi.org/10.5194/amt-10-1481-2017>, 2017.
- Heinle, L. and Chen, J.: Automated enclosure and protection system for compact solar-tracking spectrometers, *Atmos. Meas. Tech.*, 11, 2173–2185, <https://doi.org/10.5194/amt-11-2173-2018>, 2018.
- Hu, H., Landgraf, J., Detmers, R., Borsdorff, T., Brugh, J. A. d., Aben, I., Butz, A., and Hasekamp, O.: Toward Global Mapping of Methane With TROPOMI: First Results and Intersatellite Comparison to GOSAT, *Geophys. Res. Lett.*, 45, 3682–3689, 585 <https://doi.org/10.1002/2018GL077259>, 2018.
- Inness, A., Ades, M., Agusti-Panareda, A., Barre, J., Benedictow, A., Blechschmidt, A.-M., Dominguez, J., Engelen, R. J., Eskes, H., Flemming, J., Huijnen, V., Jones, L., Kipling, Z., Massart, S., Parrington, M., Peuch, V.-H., Razinger, M., Remy, S., Schulz, M., and Suttie, M.: The CAMS reanalysis of atmospheric composition, *Atmos. Chem. Phys.*, 19, 3515–3556, <https://doi.org/10.5194/acp-19-3515-2019>, 2019.
- 590 IPCC, 2013: Climate Change 2013: The Physical Science Basis. Contribution of Working Group I to the Fifth Assessment Report of the Intergovernmental Panel on Climate Change [Stocker, T.F., D. Qin, G.-K. Plattner, M. Tignor, S.K. Allen, J. Boschung, A. Nauels, Y. Xia, V. Bex and P.M. Midgley (eds.)]. Cambridge University Press, Cambridge, United Kingdom and New York, NY, USA, 1535 pp.
- 595 Jacobs, N., Simpson, W. R., Wunch, D., O'Dell, C. W., Osterman, G. B., Hase, F., Blumenstock, T., Tu, Q., Frey, M., Dubey, M. K., Parker, H. A., Kivi, R., and Heikkinen, P.: Quality controls, bias, and seasonality of CO<sub>2</sub> columns in the Boreal

- Forest with OCO-2, TCCON, and EM27/SUN measurements, *Atmos. Meas. Tech. Discuss.*, <https://doi.org/10.5194/amt-2019-505>, in review, 2020.
- Jiang, X., Kao, A., Corbett, A., Olsen, E., Pagano, T., Zhai, A., Newman, S., Li, L. and Yung, Y.: Influence of Droughts on Mid-Tropospheric CO<sub>2</sub>. *Remote Sensing*. 9. 852. 10.3390/rs9080852, 2017.
- 600 Karion, A., Sweeney, C., Tans, P., and Newberger, T.: Air-Core: An Innovative Atmospheric Sampling System, *Journal of Atmospheric and Oceanic Technology*, 27, 1839–1853, 40 <https://doi.org/10.1175/2010JTECHA1448.1>, <https://doi.org/10.1175/2010JTECHA1448.1>, 2010.
- Kille, N., Chiu, R., Frey, M., Hase, F., Sha, M. K., Blumenstock, T., Hannigan, J. W., Orphal, J., Bon, D. and Voklamer, R.: Separation of methane emissions from agricultural and natural gas sources in the Colorado Front Range. *Geophysical*
- 605 *Research Letters*, 46, 3990– 3998. <https://doi.org/10.1029/2019GL082132>, 2019.
- Kivi, R. and Heikkinen, P.: Fourier transform spectrometer measurements of column CO<sub>2</sub> at Sodankylä, Finland, *Geosci. Instrum. Method. Data Syst.*, 5, 271–279, <https://doi.org/10.5194/gi-5-271-2016>, 2016.
- Klappenbach, F., Bertleff, M., Kostinek, J., Hase, F., Blumenstock, T., Agusti-Panareda, A., Razinger, M., and Butz, A.: Accurate mobile remote sensing of XCO<sub>2</sub> and XCH<sub>4</sub> latitudinal transects from aboard a research vessel, *Atmos. Meas.*
- 610 *Tech.*, 8, 5023–5038, doi:10.5194/amt-8-5023-2015, 2015.
- Lambert, J.-C., Keppens, A., Hubert, D., Langerock, B., Eichmann, K.-U., Kleipool, Q., Sneep, M., Verhoelst, T., Wagner, T., Weber, M., Ahn, C., Argyrouli, A., Balis, D., Chan, K. L., Compernelle, S., De Smedt, I., Eskes, H., Fjæraa, A. M., Garane, K., Gleason, J. F., Goutail, F., Granville, J., Hedelt, P., Heue, K.-P., Jaross, G., Koukouli, M.-L., Landgraf, J., Lutz, R., Niemejer, S., Pazmiño, A., Pinardi, G., Pommereau, J.-P., Richter, A., Rozemeijer, N., Sha, M.K., Stein Zweers, D., Theys, N., Tilstra, G., Torres, O., Valks, P., Vigouroux, C., and Wang, P.: Quarterly Validation Report of the Copernicus Sentinel-5 Precursor Operational Data Products, #05: April 2018–November 2019, S5P MPC Routine Operations Consolidated Validation Report series, Issue #05, Version 05.0.1, 151 pp., December 2019, available at: [http://www.tropomi.eu/sites/default/files/files/publicS5P-MPC-IASB-ROCVR-03.0.1-20190621\\_FINAL.pdf](http://www.tropomi.eu/sites/default/files/files/publicS5P-MPC-IASB-ROCVR-03.0.1-20190621_FINAL.pdf) (last access: 29 June 2020), 2019.
- 620 Lambert, J.-C., Compernelle, S., Eichmann, K.-U., de Graaf, M., Hubert, D., Keppens, A., Kleipool, Q., Langerock, B., Sha, M.K., Verhoelst, T., Wagner, T., Ahn, C., Argyrouli, A., Balis, D., Chan, K.L., De Smedt, I., Eskes, H., Fjæraa, A.M., Garane, K., Gleason, J.F., Goutail, F., Granville, J., Hedelt, P., Heue, K.-P., Jaross, G., Koukouli, M.L., Landgraf, J., Lutz, R., Nanda, S., Niemejer, S., Pazmiño, A., Pinardi, G., Pommereau, J.-P., Richter, A., Rozemeijer, N., Sneep, M., Stein Zweers, D., Theys, N., Tilstra, G., Torres, O., Valks, P., Vigouroux, C., Wang, P., and Weber, M.: Quarterly Validation
- 625 *Report of the Copernicus Sentinel-5 Precursor Operational Data Products #06: April 2018 – February 2020.*, S5P MPC Routine Operations Consolidated Validation Report series, Issue #06, Version 06.0.1, 154 pp., available at: [http://www.tropomi.eu/sites/default/files/files/publicS5P-MPC-IASB-ROCVR-06.0.1-20200330\\_FINAL.pdf](http://www.tropomi.eu/sites/default/files/files/publicS5P-MPC-IASB-ROCVR-06.0.1-20200330_FINAL.pdf) (last access: 29 June 2020), March 2020.

- Lelieveld, J., Gromov, S., Pozzer, A., and Taraborrelli, D.: Global tropospheric hydroxyl distribution, budget and reactivity, *Atmos. Chem. Phys.*, 16, 12477–12493, <https://doi.org/10.5194/acp-16-12477-2016>, 2016.
- Loewenstein, M., J. R. Podolske, K. R. Chan, and S. E. Strahan: N<sub>2</sub>O as a dynamical tracer in the Arctic vortex, *Geophys. Res. Lett.*, 17, 477 – 480, 1990.
- Luther, A., Kleinschek, R., Scheidweiler, L., Defratyka, S., Stanisavljevic, M., Forstmaier, A., Dandocsi, A., Wolff, S., Dubravica, D., Wildmann, N., Kostinek, J., Jöckel, P., Nickl, A.-L., Klausner, T., Hase, F., Frey, M., Chen, J., Dietrich, F., Nęcki, J., Swolkień, J., Fix, A., Roiger, A., and Butz, A.: Quantifying CH<sub>4</sub> emissions from hard coal mines using mobile sun-viewing Fourier transform spectrometry, *Atmos. Meas. Tech.*, 12, 5217–5230, <https://doi.org/10.5194/amt-12-5217-2019>, 2019.
- Massart, S., Agustí-Panareda, A., Aben, I., Butz, A., Chevallier, F., Crevoisier, C., Engelen, R., Frankenberg, C., and Hasekamp, O.: Assimilation of atmospheric methane products into the MACC-II system: from SCIAMACHY to TANSO and IASI, *Atmos. Chem. Phys.*, 14, 6139–6158, <https://doi.org/10.5194/acp-14-6139-2014>, 2014.
- Massart, S., Agustí-Panareda, A., Heymann, J., Buchwitz, M., Chevallier, F., Reuter, M., Hilker, M., Burrows, J. P., Deutscher, N. M., Feist, D. G., Hase, F., Sussmann, R., Desmet, F., Dubey, M. K., Griffith, D. W. T., Kivi, R., Petri, C., Schneider, M., and Velasco, V. A.: Ability of the 4-D-Var analysis of the GOSAT BESD XCO<sub>2</sub> retrievals to characterize atmospheric CO<sub>2</sub> at large and synoptic scales, *Atmos. Chem. Phys.*, 16, 1653–1671, <https://doi.org/10.5194/acp-16-1653-2016>, 2016.
- Myhre, G., Shindell, D., Bréon, F.-M., Collins, W., Fuglestedt, J., Huang, J., Koch, D., Lamarque, J.-F., Lee, D., Mendoza, B., and Nakajima, T.: Anthropogenic and natural radiative forcing, *Climate Change*, 423, 658–640, 2013.
- Ostler, A., Sussmann, R., Rettinger, M., Deutscher, N. M., Dohe, S., Hase, F., Jones, N., Palm, M., and Sinnhuber, B.-M.: Multistation intercomparison of column-averaged methane from NDACC and TCCON: impact of dynamical variability, *Atmos. Meas. Tech.*, 7, 4081–4101, <https://doi.org/10.5194/amt-7-4081-2014>, 2014.
- Rigby, M., Montzka S.A., Prinn, R.G., White, J.W.C., Young, D., O’Doherty, S., Lunt, M.F., Ganesan, A.L., Manning, A.J., Simmonds, P.G., Salameh, P.K., Harth, C.M., Mühle, J., Weiss, R.F., Fraser, P.J., Steele, L.P., Krummel, P.B., McCulloch A., Park, S.: Role of OH in recent methane growth. *Proceedings of the National Academy of Sciences*, 114 (21) 5373-5377; DOI: 10.1073/pnas.1616426114, 2017.
- Rodgers, C. D.: Inverse methods for atmospheric sounding: theory and practice, vol. 2 of Series on atmospheric, oceanic and planetary 335 physics, World Scientific, Singapore, 2000.
- Rodgers, C. D. and Connor, B. J.: Intercomparison of remote sounding instruments, *J. Geophys. Res.-Atmos.*, 108, 4116–4229, doi:10.1029/2002JD002299, 2003.
- Sha, M. K. and Langerock, B.: S5P MPC VDAF and TCCON4S5P CH<sub>4</sub> validation results, presentation at the Sentinel-5P Third products Release Workshop, <https://sentinel.esa.int/documents/247904/3753563/S5PCH4-VAL-MPC-TCCON4S5P>, 2019a.
- Sha, M. K., De Mazière, M., Notholt, J., Blumenstock, T., Chen, H., Dehn, A., Griffith, D. W. T., Hase, F., Heikkinen, P., Hermans, C., Hoffmann, A., Huebner, M., Jones, N., Kivi, R., Langerock, B., Petri, C., Scolas, F., Tu, Q., and Weidmann,

- D.: Intercomparison of low and high resolution infrared spectrometers for ground-based solar remote sensing measurements of total column concentrations of CO<sub>2</sub>, CH<sub>4</sub> and CO, *Atmos. Meas. Tech. Discuss.*, <https://doi.org/10.5194/amt-2019-371>, in review, 2019b.
- 665 Sparling, L. C.: Statistical perspectives on stratospheric transport, *Rev. Geophys.*, 38(3), 417–436, doi:10.1029/1999RG000070, 2000.
- Toon, G. C.: The JPL MkIV interferometer, *Opt. Photon. News*, 2, 19–21, doi:10.1364/OPN.2.10.000019, 1991.
- Toon, G. C. and Wunch, D.: A stand-alone a priori profile generation tool for GGG2014 release (Version GGG2014.R0). CaltechDATA. <https://doi.org/10.14291/tccon.ggg2014.priors.r0/1221661>, 2017.
- 670 Toja-Silva, F. Chen, J., Hachinger S., and Hase F., “CFD simulation of CO<sub>2</sub> emission from urban thermal power plant: analysis of turbulent Schmidt number and comparison with Gaussian plume model and measurements”, *Journal of Wind Engineering and Industrial Aerodynamics*, 169, 177–193, doi: 10.1016/j.jweia.2017.07.015, 2017.
- Urban, J., Lautié, N., Le Flochmoën, E., Murtagh, D., Ricaud, P., De La Noë, J., Dupuy, E., Drouin, A., El Amraoui, L., Eriksson, P., Frisk, U., Jiménez, C., Kyrölä, E., Llewellyn, E.J., Mégie, G., Nordh, L., Olberg, M.: The northern hemisphere stratospheric vortex during the 2002–03 winter: Subsidence, chlorine activation and ozone loss observed by the Odin Sub-Millimetre Radiometer, *Geophys. Res. Lett.*, 31, L07103, doi:10.1029/2003GL019089, 2004.
- 675 Veeffkind, J., Aben, I., McMullan, K., örster, H., de Vries, J., Otter, G., Claas, J., Eskes, H., de Haan, J., Kleipool, Q., vanWeele, M., Hasekamp, O., Hoogeveen, R., Landgraf, J., Snel, R., Tol, P., Ingmann, P., P., V., Kruizinga, P., Vink, R., Visser, H., and Levelt, P.: TROPOMI on the ESA Sentinel-5 Precursor: A GMES mission for global observations of the atmospheric composition for climate, air quality and ozone layer applications, *Remote Sens. Environ.*, 120, 70–83, doi:10.1016/j.rse.2011.09.027, 2012.
- Vogel, F., Frey, M., Staufer, J., Hase, F., Broquet, G., Xueref-Remy, I., Chevallier, F., Ciais, P., Sha, M.K., Chelin, P., Jeseck, P., Janssen, C., Te, Y., Groß, J., Blumenstock, T., Tu, Q., Orphal, J.: XCO<sub>2</sub> in an emission hot-spot region: the COCCON Paris campaign 2015, *Atmospheric Chemistry and Physics*, doi: 10.5194/acp-19-3271-2019, 2019
- 685 Wang, Y., Ma, Y.-F., Eskes, H., Inness, A., Flemming, J., and Brasseur, G. P.: Evaluation of the CAMS global atmospheric trace gas reanalysis 2003–2016 using aircraft campaign observations, *Atmos. Chem. Phys. Discuss.*, <https://doi.org/10.5194/acp-2019-821>, in review, 2019.
- World Meteorological Organization, 2019: WMO Greenhouse Gases Bulletin: The State of Greenhouse Gases in the Atmosphere Based on Global Observations through 2018. No. 15, [https://library.wmo.int/doc\\_num.php?explnum\\_id=10100](https://library.wmo.int/doc_num.php?explnum_id=10100)
- 690 Wunch, D., Toon, G. C., Blavier, J.-F. L., Washenfelder, R. A., Notholt, J., Connor, B. J., Griffith, D. W. T., Sherlock, V., and Wennberg, P. O.: The total carbon column observing network, *Philos. T. R. Soc. A*, 369, 2087–2112, doi:10.1098/rsta.2010.0240, 2011.
- 695 Wunch, D., Toon, G. C., Sherlock, V., Deutscher, N. M., Liu, C., Feist, D. G., and Wennberg, P. O.: The Total Carbon Column Observing Network’s GGG2014 Data Version, Tech.rep., California Institute of Technology, Carbon Dioxide In-formation

Analysis Center, Oak Ridge National Laboratory, Oak Ridge, Tennessee, USA,  
<https://doi.org/10.14291/tccon.ggg2014.documentation.R0/1221662>, 2015.

700 Wunch, D., Wennberg, P. O., Osterman, G., Fisher, B., Naylor, B., Roehl, C. M., O'Dell, C., Mandrake, L., Viatte, C., Kiel,  
M., Griffith, D. W. T., Deutscher, N. M., Velazco, V. A., Notholt, J., Warneke, T., Petri, C., De Maziere, M., Sha, M. K.,  
Sussmann, R., Rettinger, M., Pollard, D., Robinson, J., Morino, I., Uchino, O., Hase, F., Blumenstock, T., Feist, D. G.,  
Arnold, S. G., Strong, K., Mendonca, J., Kivi, R., Heikkinen, P., Iraci, L., Podolske, J., Hillyard, P. W., Kawakami, S.,  
Dubey, M. K., Parker, H. A., Sepulveda, E., García, O. E., Te, Y., Jeseck, P., Gunson, M. R., Crisp, D., and Eldering, A.:  
705 Comparisons of the Orbiting Carbon Observatory-2 (OCO-2) XCO<sub>2</sub> measurements with TCCON, *Atmos. Meas. Tech.*, 10,  
2209–2238, <https://doi.org/10.5194/amt-10-2209-2017>, 2017.
